# Supplementary material for: HydroFATE (v1): a high-resolution contaminant fate model for the global river system
Source: Copernicus journal article supplement (doi:10.5194/gmd-17-2877-2024), 2024-04-16
Supplement: Supplementary file 1 [file gmd-17-2877-2024-supplement.pdf]

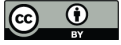

*Supplement of*

## **HydroFATE (v1): a high-resolution contaminant fate model for the global river system**

**Heloisa Ehalt Macedo et al.**

*Correspondence to:* Heloisa Ehalt Macedo ([heloisa.ehaltmacedo@mail.mcgill.ca](mailto:heloisa.ehaltmacedo@mail.mcgill.ca)) and Bernhard Lehner ([bernhard.lehner@mcgill.ca](mailto:bernhard.lehner@mcgill.ca))

The copyright of individual parts of the supplement might differ from the article licence.

## S.1 Literature sources for Measured Environmental Concentrations of sulfamethoxazole

**Table S-1. Literature sources and numbers of Measured Environmental Concentrations (MECs) of sulfamethoxazole, total and above the Limit of Detection (LOD). Full citations are provided in section S.4 below.**

| Reference                        | Country                | Number of MECs | Number of MECs above LOD |
|----------------------------------|------------------------|----------------|--------------------------|
| Arsand et al., 2020              | Brazil                 | 2              | 2                        |
| Aydin & Talinli, 2013            | Turkey                 | 4              | 4                        |
| Bagnis et al., 2020              | Kenya                  | 10             | 10                       |
| Barber et al., 2011              | United States          | 4              | 0                        |
| Batt et al., 2006                | United States          | 4              | 2                        |
| Bendz et al., 2005               | Sweden                 | 2              | 2                        |
| Böger et al., 2021               | Brazil                 | 2              | 2                        |
| Camacho-Muñoz et al., 2010       | Spain                  | 4              | 0                        |
| Carlson et al., 2013             | Canada                 | 5              | 4                        |
| Chang et al., 2010               | China                  | 4              | 3                        |
| Chau et al., 2018                | Vietnam                | 29             | 4                        |
| Chaves et al., 2020              | Brazil                 | 3              | 2                        |
| Chitescu et al., 2015            | Romania                | 13             | 13                       |
| Choi et al., 2008                | South Korea            | 4              | 4                        |
| Dinh et al., 2018                | France                 | 4              | 3                        |
| Eckberg & Pletsch, 2011          | United States          | 17             | 17                       |
| Feitosa-Felizzola & Chiron, 2009 | France                 | 1              | 0                        |
| Fick et al., 2011                | Sweden                 | 5              | 4                        |
| Finnegan et al., 2010            | United States          | 4              | 4                        |
| Fonseca et al., 2020             | Spain                  | 10             | 2                        |
| Hanna et al., 2020               | India                  | 6              | 6                        |
| Joshua et al., 2020              | India                  | 11             | 11                       |
| K'Oreje et al., 2012             | Kenya                  | 7              | 5                        |
| Kairigo et al., 2020             | Kenya                  | 1              | 0                        |
| Kandie et al., 2020              | Kenya                  | 32             | 16                       |
| Kasprzyk-Hordern et al., 2007    | United Kingdom, Poland | 6              | 2                        |
| Kasprzyk-Hordern et al., 2008    | United Kingdom         | 8              | 7                        |
| Khan, et al., 2013               | Pakistan               | 11             | 11                       |
| Khan, et al., 2012               | Sweden                 | 1              | 0                        |
| Kim & Carlson, 2007              | United States          | 4              | 3                        |
| Kunkel & Radke, 2016             | Germany                | 1              | 1                        |
| Li & Radke, 2016                 | Sweden, Germany        | 6              | 6                        |
| Locatelli et al., 2011           | Brazil                 | 5              | 4                        |
| Loper et al., 2007               | United States          | 8              | 5                        |
| López-Serna et al., 2011         | Spain                  | 21             | 4                        |
| Low et al., 2021                 | Malaysia               | 2              | 0                        |
| Luo et al., 2011                 | China                  | 6              | 6                        |
| Managaki et al., 2007            | Vietnam, Japan         | 5              | 5                        |
| Osorio et al., 2012              | Spain                  | 3              | 3                        |

|                            |                      |            |            |
|----------------------------|----------------------|------------|------------|
| Paíga et al., 2016         | Portugal             | 5          | 1          |
| Rivera-Jaimes et al., 2018 | Mexico               | 2          | 2          |
| Sharma et al., 2019        | India                | 13         | 10         |
| Shimizu et al., 2013       | Vietnam, Philippines | 5          | 5          |
| Sim et al., 2010           | South Korea          | 2          | 0          |
| Söregård et al., 2019      | Sweden               | 3          | 0          |
| Spongberg et al., 2011     | Costa Rica           | 25         | 2          |
| Stipaničev et al., 2017    | Macedonia            | 5          | 5          |
| Tamtam et al., 2008        | France               | 4          | 4          |
| ter Laak et al., 2010      | Netherlands          | 3          | 3          |
| Vilimanovic et al, 2020    | United States        | 9          | 8          |
| Wille et al., 2010         | Belgium              | 3          | 3          |
| Zhang et al., 2020         | China                | 7          | 7          |
| <b>Total</b>               | <b>World</b>         | <b>361</b> | <b>227</b> |

## S.2 Sensitivity to parameter and configuration settings

In addition to the main scenarios presented in Table 1 of the main manuscript, model simulations were conducted to analyze the sensitivity of results with regards to uncertainties inherited by each investigated parameter and configuration setting. Table S-2 shows the additional scenario settings for Scenarios 5 and 6 (i.e., representing a total of 14 sub-scenarios), and Scenario 7, which were implemented to create error bars around the results of baseline Scenario 1.

**Table S-2. Additional scenarios and their settings designed to assist in the analysis of uncertainties introduced by selected model parameters and configurations. Scenarios 5 and 6 represent two groups of sub-scenarios (a total of 14 sub-scenarios), where in each iteration the baseline configuration (Scenario 1) is maintained but one target parameter or configuration setting is changed towards their limit that induces lower or higher contamination, respectively.**

| Scenario | Parameter or configuration modified from baseline (only for sub-scenarios) | Excretion fraction | Wastewater treatment removal efficiency (%) | Direct discharge coefficient            |                   | Instream decay constant $k$ ( $\text{day}^{-1}$ ) | Configuration settings |                     |
|----------|----------------------------------------------------------------------------|--------------------|---------------------------------------------|-----------------------------------------|-------------------|---------------------------------------------------|------------------------|---------------------|
|          |                                                                            |                    |                                             | Urban $ddc_{urb}$                       | Rural $ddc_{urb}$ |                                                   | Lake removal           | Discharge condition |
| <b>1</b> | <b>Baseline</b>                                                            | 0.2                | 49                                          | 0.8                                     | 0.5               | 0.13                                              | CSTR removal           | Average-flow        |
| <b>5</b> | <b>Lower contamination limits</b>                                          |                    |                                             |                                         |                   |                                                   |                        |                     |
| 5a       | excretion fraction                                                         | 0.1                | 49                                          | 0.8                                     | 0.5               | 0.13                                              | CSTR removal           | Average-flow        |
| 5b       | wastewater treatment removal efficiency                                    | 0.2                | 100                                         | 0.8                                     | 0.5               | 0.13                                              | CSTR removal           | Average-flow        |
| 5c       | urban direct discharge coefficient                                         | 0.2                | 49                                          | 0                                       | 0.5               | 0.13                                              | CSTR removal           | Average-flow        |
| 5d       | rural urban direct discharge coefficient                                   | 0.2                | 49                                          | 0.8                                     | 0                 | 0.13                                              | CSTR removal           | Average-flow        |
| 5e       | instream decay constant                                                    | 0.2                | 49                                          | 0.8                                     | 0.5               | 2.88                                              | CSTR removal           | Average-flow        |
| 5f       | lake removal                                                               | 0.2                | 49                                          | 0.8                                     | 0.5               | 0.13                                              | Full removal           | Average-flow        |
| 5g       | discharge condition                                                        |                    |                                             | this scenario is the same as Scenario 1 |                   |                                                   |                        |                     |
| <b>6</b> | <b>Upper contamination limits</b>                                          |                    |                                             |                                         |                   |                                                   |                        |                     |
| 6a       | excretion fraction                                                         | 0.3                | 49                                          | 0.8                                     | 0.5               | 0.13                                              | CSTR removal           | Average-flow        |
| 6b       | wastewater treatment removal efficiency                                    | 0.2                | 0                                           | 0.8                                     | 0.5               | 0.13                                              | CSTR removal           | Average-flow        |
| 6c       | urban direct discharge coefficient                                         | 0.2                | 49                                          | 1                                       | 0.5               | 0.13                                              | CSTR removal           | Average-flow        |
| 6d       | rural direct discharge coefficient                                         | 0.2                | 49                                          | 0.8                                     | 1                 | 0.13                                              | CSTR removal           | Average-flow        |
| 6e       | instream decay constant                                                    | 0.2                | 49                                          | 0.8                                     | 0.5               | 0                                                 | CSTR removal           | Average-flow        |
| 6f       | lake removal                                                               | 0.2                | 49                                          | 0.8                                     | 0.5               | 0.13                                              | No removal             | Average-flow        |
| 6g       | discharge condition                                                        | 0.2                | 49                                          | 0.8                                     | 0.5               | 0.13                                              | CSTR removal           | Low-flow            |
| <b>7</b> | <b>No removal</b>                                                          | 1                  | 0                                           | 1                                       | 1                 | 0                                                 | No removal             | Low-flow            |

Figure S-1 presents the findings of the sensitivity assessment with regards to parameter settings (panels a to e), configuration settings (panel f and g), and the no-removal scenario (panel h). Panel a displays sensitivity related to variations in the excretion fractions. In HydroFATE, calculated PECs are directly proportional to the excretion fraction, and since the range reported by the literature is small, the error bars of PECs are also small. Panels b, c, and d show the influence of varying removal levels (i.e., wastewater treatment removal efficiencies or direct discharge values) associated with different types of contaminant pathways (i.e., treated versus untreated urban or rural). Panel e illustrates the sensitivity related to variations in the instream decay constants. The large ranges are due to the large uncertainties reported in literature, involving the different processes of instream decay which are highly variable and depend on various physical, chemical, and biological parameters of the local environment.

Regarding configurations, panel f of Fig. S-1 shows the model's sensitivity towards variations in lake removal methods. The CSTR method delivers average results, a compromise between likely overestimation of concentrations (no contaminant removal in lakes) and underestimation of concentrations (full removal in lakes). Panel g shows the sensitivity of results caused by presumed river discharge conditions. For some locations, the difference between MECs and PECs would be substantially decreased if using low flow discharge conditions (instead of average flow conditions) in the model simulations. This analysis demonstrates that cases in which PECs were too low could, in part, be explained by uncertainties within the measurements (i.e., measurements potentially taken at low flow conditions rather than errors in the model predictions.

Finally, panel d of Fig. S-1 illustrates the worst-case Scenario 7 which results in the maximum values of PECs based on parameter and configuration settings that corresponding to the elimination of all contaminant removal processes. Most upper limits of the error bars are above the 1:1 line, indicating the critical importance of the removal simulations in the model.

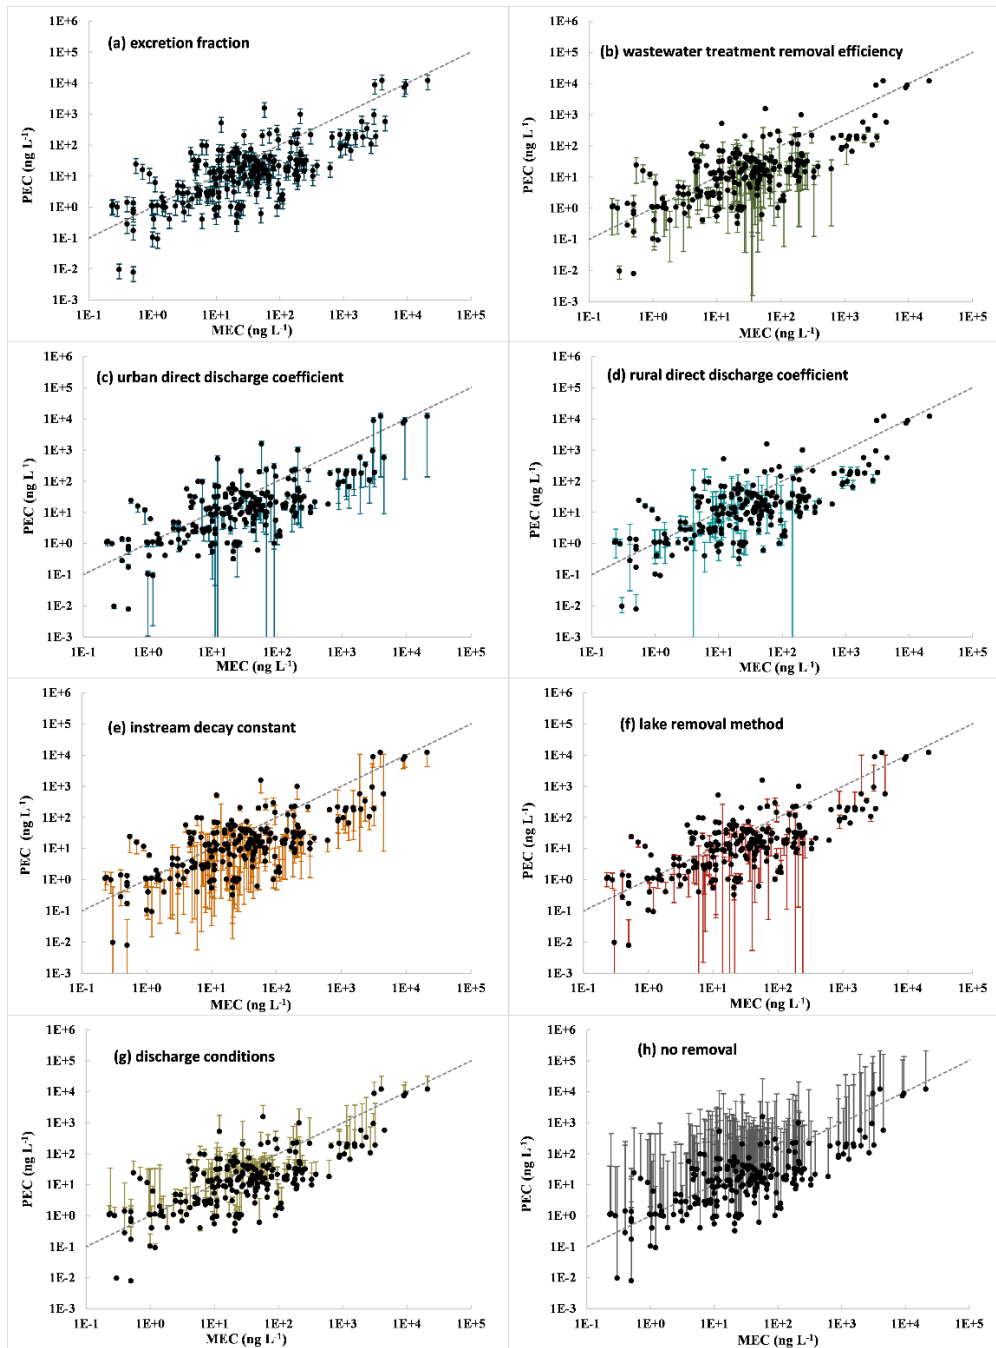

40 **Figure S-1. Sensitivity of estimated antibiotic concentrations to changes in HydroFATE parameter and**  
**configuration settings. Black points represent comparisons between the Measured (MEC) and the Predicted (PEC)**  
**Environmental Concentrations for Scenario 1 (baseline). The black line in each panel represents the 1:1**  
**correspondence line between predicted and measured concentrations. The error bars represent the range of the**  
45 **resulting PECs using the range of each input parameter and configuration setting as listed for the different**  
**scenarios in Table S-2: (a) excretion fraction for Scenarios 5a and 6a; (b) wastewater treatment removal efficiency**  
**for Scenarios 5b and 6b; (c) urban direct discharge coefficient for Scenarios 5c and 6c; (d) rural direct discharge**  
**coefficient for Scenarios 5d and 6d; and (e) instream decay constant for Scenarios 5e and 6e; (f) lake removal**  
**method for Scenario 5f and 6f; and (g) discharge conditions for Scenario 6g. Panel (h) represents a worst-case**  
50 **scenario using parameter and configuration settings as listed for Scenario 7 assuming no removal processes. In**  
**all panels, error bars that extend below  $10^{-3}$  ng L<sup>-1</sup> may include predicted zero concentrations.**

### S.3 Country statistics as results of the case study

Table S-3 is a complete version of Table 2 in the main manuscript. It shows country statistics on consumption and emission of SMX to rivers and lakes for different sources and contaminant pathways. Table S-4 is a complete version of Table 3 in the main manuscript. It shows the total length of rivers with a predicted risk quotient  $\geq 1$  for SMX for different scenarios.

55

**Table S-3. National consumption as well as population sources and emission rates of SMX per country by pathway.**

| Country                           | Population source (%)    |                 |                 | Consumption                 |                                    | Total emission to rivers and lakes (kg y <sup>-1</sup> ) | Emission to Consumption ratio (%) | Contaminant pathway into rivers or lakes (%) |                 |                 |
|-----------------------------------|--------------------------|-----------------|-----------------|-----------------------------|------------------------------------|----------------------------------------------------------|-----------------------------------|----------------------------------------------|-----------------|-----------------|
|                                   | Treated (WWTPs and DWTS) | Urban untreated | Rural untreated | Total (kg y <sup>-1</sup> ) | per capita (µg day <sup>-1</sup> ) |                                                          |                                   | Treated (WWTPs and DWTS)                     | Urban untreated | Rural untreated |
| Afghanistan                       | 3.3                      | 20.4            | 76.3            | 11,500                      | 1,156                              | 881                                                      | 7.7                               | 4.4                                          | 42.5            | 53.0            |
| Åland                             | 0.0                      | 0.2             | 99.8            | 0.3                         | 143                                | 0.0                                                      | 4.3                               | 0.0                                          | 0.9             | 99.1            |
| Albania                           | 86.1                     | 0.0             | 13.9            | 1,190                       | 1,285                              | 113                                                      | 9.5                               | 92.1                                         | 0.1             | 7.9             |
| Algeria                           | 81.6                     | 0.1             | 18.3            | 18,800                      | 1,732                              | 1,730                                                    | 9.2                               | 90.1                                         | 0.2             | 9.8             |
| Andorra                           | 79.3                     | 4.7             | 16.0            | 25                          | 725                                | 2                                                        | 9.7                               | 82.9                                         | 7.8             | 9.3             |
| Angola                            | 4.1                      | 21.4            | 74.5            | 4,970                       | 647                                | 372                                                      | 7.5                               | 5.5                                          | 45.8            | 48.7            |
| Anguilla                          | 3.3                      | 45.1            | 51.6            | 1                           | 486                                | 0.1                                                      | 9.9                               | 3.4                                          | 73.3            | 23.4            |
| Antigua and Barbuda               | 0.0                      | 61.6            | 38.4            | 9                           | 731                                | 1                                                        | 11.6                              | 0.0                                          | 84.6            | 15.4            |
| Argentina                         | 53.8                     | 17.9            | 28.4            | 9,370                       | 729                                | 919                                                      | 9.8                               | 55.9                                         | 29.2            | 14.9            |
| Armenia                           | 69.7                     | 5.7             | 24.6            | 1,340                       | 1,311                              | 126                                                      | 9.5                               | 75.1                                         | 9.7             | 15.2            |
| Aruba                             | 0.0                      | 79.0            | 21.0            | 3                           | 748                                | 0.4                                                      | 13.5                              | 0.0                                          | 94.0            | 6.0             |
| Australia                         | 97.4                     | 0.0             | 2.6             | 3,140                       | 720                                | 316                                                      | 10.1                              | 98.7                                         | 0.0             | 1.3             |
| Austria                           | 93.0                     | 0.0             | 7.0             | 264                         | 84                                 | 26                                                       | 9.8                               | 96.4                                         | 0.0             | 3.6             |
| Azerbaijan                        | 24.6                     | 13.7            | 61.7            | 3,420                       | 1,255                              | 275                                                      | 8.0                               | 31.2                                         | 27.3            | 41.5            |
| Bahamas                           | 0.0                      | 53.4            | 46.6            | 27                          | 769                                | 3                                                        | 10.7                              | 0.0                                          | 79.8            | 20.2            |
| Bahrain                           | 0.0                      | 71.6            | 28.4            | 46                          | 748                                | 6                                                        | 12.6                              | 0.0                                          | 90.9            | 9.1             |
| Bangladesh                        | 5.0                      | 42.4            | 52.6            | 39,100                      | 714                                | 4,100                                                    | 10.5                              | 4.9                                          | 64.7            | 30.4            |
| Barbados                          | 0.0                      | 69.5            | 30.5            | 41                          | 750                                | 5                                                        | 12.7                              | 0.0                                          | 87.5            | 12.5            |
| Belarus                           | 91.4                     | 0.0             | 8.6             | 4,160                       | 1,247                              | 405                                                      | 9.7                               | 95.7                                         | 0.0             | 4.3             |
| Belgium                           | 94.9                     | 0.0             | 5.0             | 1,640                       | 445                                | 163                                                      | 9.9                               | 97.4                                         | 0.1             | 2.5             |
| Belize                            | 2.1                      | 8.3             | 89.6            | 141                         | 1,202                              | 9                                                        | 6.5                               | 3.3                                          | 20.2            | 76.5            |
| Benin                             | 0.8                      | 36.6            | 62.6            | 6,220                       | 1,634                              | 555                                                      | 8.9                               | 0.9                                          | 65.7            | 33.4            |
| Bhutan                            | 3.8                      | 4.9             | 91.2            | 383                         | 1,334                              | 24                                                       | 6.3                               | 6.1                                          | 12.5            | 81.4            |
| Bolivia                           | 48.3                     | 3.2             | 48.4            | 4,650                       | 1,233                              | 370                                                      | 8.0                               | 61.9                                         | 6.5             | 31.6            |
| Bonaire, Saint Eustatius and Saba | 0.0                      | 18.3            | 81.7            | 1                           | 486                                | 0.1                                                      | 5.9                               | 0.0                                          | 49.5            | 50.5            |
| Bosnia and Herzegovina            | 55.4                     | 0.9             | 43.7            | 4,720                       | 3,803                              | 385                                                      | 8.2                               | 69.2                                         | 1.7             | 29.2            |
| Botswana                          | 1.6                      | 25.3            | 73.1            | 887                         | 1,292                              | 70                                                       | 7.9                               | 2.0                                          | 51.3            | 46.7            |
| Brazil                            | 61.8                     | 17.0            | 21.2            | 77,400                      | 1,189                              | 7,910                                                    | 10.2                              | 61.7                                         | 26.7            | 11.6            |
| Brunei                            | 89.9                     | 0.4             | 9.7             | 65                          | 756                                | 6                                                        | 9.8                               | 93.2                                         | 0.6             | 6.2             |
| Bulgaria                          | 73.6                     | 0.7             | 25.7            | 3,560                       | 1,422                              | 317                                                      | 8.9                               | 84.4                                         | 1.3             | 14.2            |
| Burkina Faso                      | 0.9                      | 19.7            | 79.3            | 11,300                      | 1,634                              | 795                                                      | 7.0                               | 1.4                                          | 45.1            | 53.5            |
| Burundi                           | 1.0                      | 29.1            | 69.9            | 4,760                       | 1,339                              | 391                                                      | 8.2                               | 1.2                                          | 56.8            | 42.0            |
| Cambodia                          | 13.3                     | 18.6            | 68.1            | 7,300                       | 1,252                              | 594                                                      | 8.1                               | 16.7                                         | 36.6            | 46.8            |
| Cameroon                          | 1.1                      | 31.5            | 67.3            | 14,000                      | 1,634                              | 1,250                                                    | 8.9                               | 1.3                                          | 56.8            | 41.9            |
| Canada                            | 83.6                     | 1.2             | 15.2            | 12,600                      | 1,187                              | 1,200                                                    | 9.6                               | 89.0                                         | 2.0             | 9.0             |
| Cayman Islands                    | 0.0                      | 71.5            | 28.5            | 1                           | 720                                | 0.1                                                      | 12.8                              | 0.0                                          | 89.3            | 10.7            |
| Central African Republic          | 0.0                      | 25.7            | 74.3            | 2,340                       | 1,354                              | 181                                                      | 7.7                               | 0.0                                          | 53.1            | 46.9            |
| Chad                              | 0.7                      | 6.7             | 92.6            | 8,020                       | 1,634                              | 451                                                      | 5.6                               | 1.3                                          | 19.1            | 79.6            |
| Chile                             | 82.6                     | 0.2             | 17.2            | 2,470                       | 418                                | 234                                                      | 9.5                               | 89.0                                         | 0.4             | 10.6            |
| China                             | 57.3                     | 8.0             | 34.7            | 31,800                      | 67                                 | 2,860                                                    | 9.0                               | 65.0                                         | 14.2            | 20.8            |
| Colombia                          | 66.2                     | 0.6             | 33.2            | 20,900                      | 1,093                              | 1,830                                                    | 8.8                               | 76.8                                         | 1.1             | 22.1            |
| Comoros                           | 2.0                      | 19.7            | 78.4            | 193                         | 1,251                              | 15                                                       | 8.0                               | 2.5                                          | 39.5            | 58.0            |
| Costa Rica                        | 25.3                     | 40.2            | 34.5            | 773                         | 486                                | 87                                                       | 11.3                              | 22.9                                         | 57.2            | 19.9            |
| Côte d'Ivoire                     | 2.7                      | 33.7            | 63.6            | 13,200                      | 1,634                              | 1,170                                                    | 8.8                               | 3.1                                          | 61.1            | 35.7            |
| Croatia                           | 55.5                     | 1.2             | 43.3            | 1,440                       | 1,067                              | 118                                                      | 8.2                               | 69.2                                         | 2.3             | 28.5            |

|                                  |       |      |      |         |       |        |      |       |      |      |
|----------------------------------|-------|------|------|---------|-------|--------|------|-------|------|------|
| Cuba                             | 37.9  | 4.2  | 57.9 | 3,830   | 1,253 | 288    | 7.5  | 51.4  | 8.8  | 39.8 |
| Curaçao                          | 0.0   | 86.3 | 13.7 | 21      | 742   | 3      | 14.3 | 0.0   | 96.9 | 3.1  |
| Cyprus                           | 38.9  | 20.4 | 40.7 | 183     | 748   | 17     | 9.4  | 42.4  | 34.7 | 22.9 |
| Czech Republic                   | 88.2  | 0.1  | 11.7 | 5,110   | 1,330 | 490    | 9.6  | 93.8  | 0.2  | 6.0  |
| Democratic Republic of the Congo | 0.3   | 28.4 | 71.4 | 39,900  | 1,236 | 3,220  | 8.1  | 0.3   | 56.2 | 43.4 |
| Denmark                          | 68.5  | 0.0  | 31.5 | 374     | 750   | 32     | 8.7  | 80.7  | 0.0  | 19.2 |
| Djibouti                         | 0.0   | 27.3 | 72.7 | 293     | 1,217 | 24     | 8.1  | 0.0   | 54.0 | 46.0 |
| Dominica                         | 10.2  | 9.7  | 80.1 | 18      | 1,265 | 1      | 7.5  | 13.8  | 20.6 | 65.6 |
| Dominican Republic               | 7.0   | 54.1 | 38.9 | 858     | 308   | 99     | 11.5 | 6.2   | 75.4 | 18.4 |
| East Timor                       | 7.0   | 19.6 | 73.3 | 464     | 1,278 | 35     | 7.5  | 9.6   | 41.8 | 48.7 |
| Ecuador                          | 60.4  | 1.7  | 37.8 | 22,800  | 4,126 | 1,970  | 8.7  | 71.1  | 3.2  | 25.7 |
| Egypt                            | 65.8  | 25.2 | 8.9  | 55,500  | 1,920 | 6,220  | 11.2 | 60.0  | 36.1 | 4.0  |
| El Salvador                      | 40.1  | 19.9 | 39.9 | 1,070   | 486   | 103    | 9.6  | 42.8  | 33.4 | 23.8 |
| Equatorial Guinea                | 0.1   | 1.1  | 98.9 | 197     | 524   | 12     | 6.2  | 0.1   | 2.7  | 97.2 |
| Eritrea                          | 3.8   | 15.5 | 80.7 | 2,330   | 1,661 | 156    | 6.7  | 5.7   | 37.0 | 57.3 |
| Estonia                          | 77.6  | 0.1  | 22.3 | 176     | 877   | 16     | 9.1  | 87.1  | 0.2  | 12.8 |
| Ethiopia                         | 1.2   | 20.9 | 77.9 | 40,400  | 1,214 | 2,940  | 7.3  | 1.7   | 45.9 | 52.5 |
| Falkland Islands                 | 100.0 | 0.0  | 0.0  | 0.0     | 239   | 0.0    | 10.2 | 100.0 | 0.0  | 0.0  |
| Faroe Islands                    | 0.0   | 38.8 | 61.2 | 8       | 760   | 1      | 9.9  | 0.0   | 62.7 | 37.3 |
| Fiji                             | 0.0   | 28.0 | 72.0 | 203     | 1,269 | 19     | 9.2  | 0.0   | 48.8 | 51.2 |
| Finland                          | 79.2  | 0.0  | 20.8 | 151     | 143   | 14     | 9.0  | 89.3  | 0.0  | 10.7 |
| France                           | 81.5  | 0.5  | 18.0 | 12,300  | 612   | 1,160  | 9.4  | 88.8  | 0.9  | 10.3 |
| French Guiana                    | 16.2  | 6.8  | 77.0 | 72      | 1,271 | 5      | 7.5  | 22.0  | 14.5 | 63.5 |
| Gabon                            | 24.7  | 2.0  | 73.3 | 863     | 1,069 | 61     | 7.1  | 35.7  | 4.4  | 59.9 |
| Gambia                           | 0.0   | 41.6 | 58.4 | 687     | 1,163 | 65     | 9.5  | 0.0   | 70.4 | 29.6 |
| Georgia                          | 49.7  | 5.9  | 44.4 | 1,730   | 1,289 | 150    | 8.6  | 58.7  | 10.9 | 30.4 |
| Germany                          | 99.1  | 0.0  | 0.9  | 22,300  | 816   | 2,270  | 10.1 | 99.6  | 0.0  | 0.4  |
| Ghana                            | 1.5   | 39.5 | 59.0 | 11,900  | 1,215 | 1,110  | 9.4  | 1.7   | 67.6 | 30.8 |
| Greece                           | 55.4  | 0.1  | 44.5 | 661     | 507   | 53     | 8.0  | 71.0  | 0.2  | 28.8 |
| Greenland                        | 97.0  | 0.0  | 3.0  | 2       | 761   | 0.2    | 10.0 | 98.8  | 0.0  | 1.2  |
| Grenada                          | 7.3   | 39.5 | 53.2 | 17      | 1,208 | 2      | 9.8  | 7.6   | 64.8 | 27.6 |
| Guadeloupe                       | 3.8   | 24.7 | 71.5 | 30      | 486   | 3      | 8.4  | 4.6   | 47.4 | 48.0 |
| Guam                             | 0.0   | 2.8  | 97.2 | 1       | 777   | 0.0    | 6.2  | 0.0   | 7.2  | 92.8 |
| Guatemala                        | 41.4  | 6.9  | 51.8 | 2,860   | 486   | 239    | 8.3  | 50.6  | 13.1 | 36.3 |
| Guernsey                         | 0.0   | 86.1 | 13.9 | 3       | 1,911 | 0.5    | 14.2 | 0.0   | 96.8 | 3.2  |
| Guinea                           | 0.1   | 27.0 | 73.0 | 6,150   | 1,634 | 513    | 8.3  | 0.1   | 51.7 | 48.2 |
| Guinea-Bissau                    | 3.6   | 23.8 | 72.6 | 726     | 1,309 | 58     | 8.0  | 4.5   | 47.4 | 48.0 |
| Guyana                           | 2.6   | 39.3 | 58.2 | 243     | 1,271 | 24     | 9.9  | 2.7   | 63.5 | 33.8 |
| Haiti                            | 0.0   | 47.9 | 52.1 | 4,360   | 1,255 | 450    | 10.3 | 0.0   | 74.2 | 25.8 |
| Honduras                         | 39.3  | 3.6  | 57.1 | 1,490   | 486   | 114    | 7.7  | 52.2  | 7.5  | 40.4 |
| Hong Kong                        | 31.0  | 56.6 | 12.4 | 60      | 360   | 8      | 12.8 | 24.8  | 70.8 | 4.4  |
| Hungary                          | 80.2  | 1.1  | 18.7 | 3,140   | 888   | 293    | 9.3  | 87.8  | 1.8  | 10.4 |
| Iceland                          | 100.0 | 0.0  | 0.0  | 13      | 745   | 1      | 10.2 | 100.0 | 0.0  | 0.0  |
| India                            | 8.0   | 29.2 | 62.7 | 366,000 | 801   | 32,300 | 8.8  | 9.3   | 53.0 | 37.7 |
| Indonesia                        | 5.0   | 52.5 | 42.5 | 74,800  | 904   | 8,610  | 11.5 | 4.4   | 73.1 | 22.5 |
| Iran                             | 27.2  | 18.4 | 54.5 | 34,700  | 1,265 | 3,010  | 8.7  | 31.9  | 33.9 | 34.2 |
| Iraq                             | 24.7  | 19.0 | 56.3 | 17,400  | 1,246 | 1,460  | 8.4  | 30.1  | 36.1 | 33.8 |
| Ireland                          | 51.6  | 0.8  | 47.5 | 251     | 307   | 21     | 8.2  | 64.1  | 1.6  | 34.2 |
| Isle of Man                      | 0.0   | 65.2 | 34.8 | 15      | 789   | 2      | 12.7 | 0.0   | 81.9 | 18.1 |
| Israel                           | 92.7  | 4.2  | 3.1  | 1,230   | 735   | 126    | 10.3 | 91.9  | 6.6  | 1.5  |
| Italy                            | 89.4  | 3.2  | 7.5  | 12,200  | 792   | 1,220  | 10.0 | 90.8  | 5.0  | 4.1  |
| Jamaica                          | 0.0   | 46.2 | 53.8 | 710     | 1,173 | 73     | 10.3 | 0.0   | 71.8 | 28.2 |
| Japan                            | 57.7  | 19.3 | 23.0 | 10,600  | 412   | 1,100  | 10.4 | 56.5  | 29.8 | 13.7 |
| Jersey                           | 0.0   | 91.4 | 8.6  | 3       | 239   | 0.5    | 15.0 | 0.0   | 97.6 | 2.4  |
| Jordan                           | 90.9  | 0.2  | 8.8  | 948     | 411   | 93     | 9.8  | 95.1  | 0.4  | 4.6  |
| Kazakhstan                       | 43.6  | 1.4  | 55.0 | 7,280   | 1,305 | 546    | 7.5  | 59.2  | 2.9  | 37.9 |
| Kenya                            | 5.4   | 40.2 | 54.4 | 19,600  | 1,182 | 1,920  | 9.8  | 5.7   | 65.9 | 28.4 |
| Kosovo                           | 19.5  | 11.6 | 68.8 | 839     | 1,201 | 63     | 7.5  | 26.7  | 25.0 | 48.3 |
| Kuwait                           | 98.8  | 0.2  | 1.0  | 15      | 40    | 2      | 10.2 | 99.1  | 0.4  | 0.5  |
| Kyrgyzstan                       | 15.1  | 24.7 | 60.1 | 2,600   | 1,240 | 232    | 8.9  | 17.4  | 44.5 | 38.1 |
| Laos                             | 1.1   | 19.7 | 79.2 | 3,170   | 1,258 | 264    | 8.3  | 1.3   | 37.9 | 60.8 |
| Latvia                           | 66.4  | 0.0  | 33.6 | 1,100   | 2,010 | 93     | 8.4  | 80.6  | 0.0  | 19.4 |
| Lebanon                          | 43.2  | 37.4 | 19.5 | 235     | 132   | 27     | 11.4 | 38.5  | 52.3 | 9.2  |
| Lesotho                          | 3.2   | 22.8 | 74.0 | 870     | 1,301 | 66     | 7.6  | 4.3   | 47.7 | 48.0 |
| Liberia                          | 0.0   | 30.6 | 69.4 | 1,660   | 1,242 | 153    | 9.2  | 0.0   | 53.3 | 46.7 |
| Libya                            | 61.9  | 0.4  | 37.7 | 1,950   | 1,219 | 162    | 8.3  | 75.8  | 0.9  | 23.3 |



|                                  |       |      |       |         |       |        |      |       |      |       |
|----------------------------------|-------|------|-------|---------|-------|--------|------|-------|------|-------|
| Liechtenstein                    | 99.2  | 0.0  | 0.8   | 17      | 750   | 2      | 10.2 | 99.5  | 0.0  | 0.5   |
| Lithuania                        | 90.3  | 0.0  | 9.7   | 621     | 636   | 60     | 9.6  | 95.8  | 0.0  | 4.2   |
| Luxembourg                       | 99.2  | 0.1  | 0.7   | 111     | 622   | 11     | 10.2 | 99.5  | 0.1  | 0.4   |
| Macedonia                        | 73.2  | 0.2  | 26.7  | 964     | 1,276 | 85     | 8.8  | 84.9  | 0.3  | 14.9  |
| Madagascar                       | 1.0   | 18.8 | 80.3  | 10,200  | 1,226 | 789    | 7.8  | 1.3   | 38.7 | 60.0  |
| Malawi                           | 2.2   | 42.2 | 55.6  | 7,250   | 1,255 | 711    | 9.8  | 2.3   | 68.8 | 28.8  |
| Malaysia                         | 67.5  | 3.7  | 28.8  | 1,560   | 198   | 144    | 9.3  | 74.4  | 6.4  | 19.2  |
| Mali                             | 1.3   | 27.2 | 71.5  | 10,900  | 1,634 | 878    | 8.0  | 1.7   | 54.2 | 44.1  |
| Malta                            | 0.0   | 0.0  | 100.0 | 0.0     | 723   | 0.0    | 2.1  | 0.0   | 0.0  | 100.0 |
| Martinique                       | 0.0   | 1.3  | 98.7  | 15      | 486   | 1      | 5.5  | 0.0   | 3.8  | 96.2  |
| Mauritania                       | 3.0   | 23.9 | 73.1  | 1,490   | 1,239 | 116    | 7.8  | 3.9   | 49.1 | 47.0  |
| Mayotte                          | 0.0   | 0.0  | 100.0 | 7       | 1,226 | 0.4    | 5.1  | 0.0   | 0.0  | 100.0 |
| Mexico                           | 78.4  | 4.3  | 17.4  | 63,000  | 1,504 | 6,090  | 9.7  | 82.8  | 7.0  | 10.2  |
| Micronesia                       | 0.0   | 2.3  | 97.7  | 8       | 1,221 | 1      | 6.8  | 0.0   | 5.4  | 94.6  |
| Moldova                          | 35.6  | 5.8  | 58.6  | 2,180   | 1,605 | 168    | 7.7  | 47.0  | 12.1 | 40.8  |
| Mongolia                         | 26.3  | 10.5 | 63.2  | 1,090   | 1,229 | 86     | 7.9  | 34.1  | 21.4 | 44.5  |
| Montenegro                       | 42.2  | 1.9  | 55.9  | 241     | 1,247 | 20     | 8.1  | 53.3  | 3.7  | 43.0  |
| Montserrat                       | 0.0   | 0.0  | 100.0 | 0.0     | 486   | 0.0    | 8.0  | 0.0   | 0.0  | 100.0 |
| Morocco                          | 49.4  | 9.1  | 41.6  | 9,970   | 982   | 868    | 8.7  | 57.8  | 16.7 | 25.6  |
| Mozambique                       | 0.2   | 19.9 | 79.9  | 11,100  | 1,269 | 793    | 7.1  | 0.2   | 44.7 | 55.0  |
| Myanmar                          | 1.2   | 30.6 | 68.2  | 22,700  | 1,292 | 2,070  | 9.1  | 1.3   | 53.7 | 45.0  |
| Namibia                          | 37.5  | 6.4  | 56.1  | 955     | 1,311 | 75     | 7.8  | 48.9  | 13.1 | 38.0  |
| Nauru                            | 13.1  | 12.6 | 74.3  | 0.4     | 616   | 0.0    | 8.5  | 15.8  | 23.8 | 60.4  |
| Nepal                            | 4.7   | 40.4 | 54.9  | 14,800  | 1,325 | 1,510  | 10.2 | 4.7   | 63.2 | 32.1  |
| Netherlands                      | 98.2  | 0.0  | 1.8   | 2,370   | 512   | 240    | 10.1 | 99.1  | 0.0  | 0.9   |
| New Caledonia                    | 0.0   | 19.4 | 80.6  | 32      | 738   | 3      | 8.0  | 0.0   | 38.6 | 61.4  |
| New Zealand                      | 74.8  | 0.5  | 24.7  | 575     | 1,126 | 54     | 9.3  | 82.0  | 0.9  | 17.1  |
| Nicaragua                        | 24.2  | 12.4 | 63.4  | 1,080   | 486   | 85     | 7.8  | 31.5  | 25.3 | 43.3  |
| Niger                            | 1.0   | 11.4 | 87.5  | 11,400  | 1,634 | 718    | 6.3  | 1.7   | 29.1 | 69.2  |
| Nigeria                          | 8.3   | 37.3 | 54.3  | 82,300  | 1,236 | 7,960  | 9.7  | 8.8   | 61.8 | 29.5  |
| North Korea                      | 50.2  | 7.6  | 42.2  | 9,770   | 1,267 | 847    | 8.7  | 59.1  | 14.1 | 26.8  |
| Northern Mariana Islands         | 0.0   | 0.0  | 100.0 | 3       | 1,242 | 0.2    | 5.4  | 0.0   | 0.0  | 100.0 |
| Norway                           | 69.7  | 0.0  | 30.3  | 394     | 631   | 35     | 9.0  | 79.4  | 0.0  | 20.6  |
| Oman                             | 5.2   | 11.8 | 83.0  | 634     | 716   | 45     | 7.1  | 7.4   | 26.8 | 65.8  |
| Pakistan                         | 18.5  | 23.1 | 58.3  | 223,000 | 3,155 | 19,100 | 8.6  | 22.1  | 43.3 | 34.6  |
| Palau                            | 5.3   | 0.0  | 94.7  | 2       | 1,484 | 0.1    | 5.8  | 9.4   | 0.0  | 90.6  |
| Palestina                        | 38.5  | 49.9 | 11.6  | 1,680   | 1,267 | 210    | 12.5 | 31.5  | 64.0 | 4.5   |
| Panama                           | 7.0   | 32.9 | 60.1  | 412     | 486   | 39     | 9.5  | 7.5   | 55.2 | 37.3  |
| Papua New Guinea                 | 4.0   | 3.9  | 92.1  | 3,120   | 1,164 | 209    | 6.7  | 6.1   | 9.3  | 84.6  |
| Paraguay                         | 3.0   | 45.4 | 51.7  | 2,810   | 1,244 | 282    | 10.0 | 3.0   | 72.3 | 24.7  |
| Peru                             | 48.7  | 1.5  | 49.8  | 8,800   | 1,256 | 704    | 8.0  | 62.1  | 2.9  | 35.0  |
| Philippines                      | 1.6   | 66.7 | 31.7  | 13,300  | 453   | 1,710  | 12.8 | 1.3   | 83.1 | 15.6  |
| Poland                           | 72.9  | 2.5  | 24.6  | 12,400  | 912   | 1,120  | 9.1  | 81.9  | 4.4  | 13.6  |
| Portugal                         | 77.0  | 3.3  | 19.6  | 1,590   | 971   | 150    | 9.4  | 83.2  | 5.7  | 11.2  |
| Puerto Rico                      | 87.0  | 1.7  | 11.3  | 1,410   | 2,287 | 137    | 9.7  | 91.1  | 2.8  | 6.1   |
| Qatar                            | 64.1  | 10.7 | 25.2  | 634     | 628   | 60     | 9.5  | 69.0  | 18.0 | 13.0  |
| Republic of Congo                | 14.2  | 35.2 | 50.6  | 2,400   | 1,634 | 228    | 9.5  | 15.2  | 59.1 | 25.7  |
| Romania                          | 48.5  | 12.6 | 38.9  | 10,600  | 1,408 | 965    | 9.1  | 54.1  | 22.0 | 23.9  |
| Russia                           | 79.9  | 0.2  | 19.9  | 32,700  | 696   | 3,020  | 9.2  | 88.3  | 0.3  | 11.4  |
| Rwanda                           | 1.1   | 43.0 | 56.0  | 5,300   | 1,260 | 514    | 9.7  | 1.1   | 70.9 | 28.0  |
| Saint Kitts and Nevis            | 0.0   | 0.0  | 100.0 | 0.0     | 1,330 | 0.0    | 1.7  | 0.0   | 0.0  | 100.0 |
| Saint Lucia                      | 0.0   | 40.9 | 59.1  | 48      | 1,274 | 5      | 10.2 | 0.0   | 63.8 | 36.2  |
| Saint Pierre and Miquelon        | 0.0   | 0.0  | 100.0 | 0.0     | 1,187 | 0.0    | 10.0 | 0.0   | 0.0  | 100.0 |
| Saint Vincent and the Grenadines | 4.9   | 49.7 | 45.3  | 19      | 1,250 | 2      | 11.0 | 4.6   | 72.0 | 23.4  |
| Saint-Martin                     | 0.0   | 42.2 | 57.8  | 1       | 960   | 0.1    | 8.9  | 0.0   | 76.1 | 23.9  |
| San Marino                       | 73.6  | 6.5  | 19.9  | 4       | 716   | 0.4    | 9.6  | 78.2  | 10.9 | 10.9  |
| Sao Tome and Principe            | 6.6   | 14.5 | 78.9  | 49      | 1,182 | 4      | 7.5  | 9.0   | 31.1 | 59.9  |
| Saudi Arabia                     | 50.9  | 1.3  | 47.8  | 2,670   | 261   | 210    | 7.9  | 65.9  | 2.7  | 31.4  |
| Senegal                          | 0.8   | 13.7 | 85.5  | 6,540   | 1,634 | 418    | 6.4  | 1.3   | 34.3 | 64.4  |
| Serbia                           | 68.8  | 1.6  | 29.7  | 1,370   | 531   | 122    | 8.9  | 79.2  | 2.8  | 18.0  |
| Seychelles                       | 100.0 | 0.0  | 0.0   | 0.0     | 1,210 | 0.0    | 10.2 | 100.0 | 0.0  | 0.0   |
| Sierra Leone                     | 0.0   | 34.9 | 65.1  | 2,240   | 1,113 | 217    | 9.7  | 0.0   | 57.5 | 42.5  |

|                          |             |             |             |                  |              |                |            |             |             |             |
|--------------------------|-------------|-------------|-------------|------------------|--------------|----------------|------------|-------------|-------------|-------------|
| Singapore                | 100.0       | 0.0         | 0.0         | 85               | 349          | 9              | 10.2       | 100.0       | 0.0         | 0.0         |
| Sint Maarten             | 0.0         | 100.0       | 0.0         | 0.1              | 960          | 0.0            | 16.0       | 0.0         | 100.0       | 0.0         |
| Slovakia                 | 69.5        | 0.8         | 29.6        | 1,190            | 611          | 105            | 8.8        | 80.3        | 1.5         | 18.2        |
| Slovenia                 | 70.8        | 2.9         | 26.3        | 1,380            | 1,910        | 128            | 9.3        | 78.0        | 5.0         | 17.0        |
| Solomon Islands          | 6.5         | 9.1         | 84.4        | 107              | 1,200        | 9              | 8.1        | 8.2         | 18.1        | 73.8        |
| Somalia                  | 9.8         | 3.4         | 86.8        | 3,150            | 963          | 184            | 5.8        | 17.1        | 9.3         | 73.6        |
| South Africa             | 47.7        | 28.2        | 24.1        | 102,000          | 6,216        | 10,700         | 10.6       | 46.2        | 42.8        | 11.1        |
| South Korea              | 97.3        | 0.0         | 2.7         | 4,590            | 390          | 462            | 10.1       | 98.6        | 0.0         | 1.4         |
| South Sudan              | 0.9         | 0.7         | 98.4        | 5,990            | 1,391        | 299            | 5.0        | 1.7         | 2.3         | 95.9        |
| Spain                    | 88.4        | 0.1         | 11.5        | 7,990            | 768          | 769            | 9.6        | 93.7        | 0.1         | 6.2         |
| Sri Lanka                | 1.2         | 66.2        | 32.5        | 3,020            | 462          | 378            | 12.5       | 1.0         | 84.5        | 14.4        |
| Sudan                    | 1.1         | 15.7        | 83.2        | 17,200           | 1,280        | 1,170          | 6.8        | 1.6         | 37.0        | 61.4        |
| Suriname                 | 1.2         | 53.6        | 45.2        | 227              | 1,195        | 26             | 11.4       | 1.1         | 75.4        | 23.5        |
| Swaziland                | 12.3        | 9.7         | 78.0        | 569              | 1,458        | 37             | 6.6        | 19.1        | 23.6        | 57.3        |
| Sweden                   | 75.8        | 0.1         | 24.1        | 883              | 550          | 79             | 9.0        | 86.0        | 0.1         | 13.9        |
| Switzerland              | 97.8        | 0.1         | 2.1         | 2,570            | 852          | 260            | 10.1       | 98.7        | 0.2         | 1.1         |
| Syria                    | 55.9        | 8.7         | 35.4        | 11,400           | 1,362        | 1,000          | 9.0        | 63.5        | 15.5        | 21.0        |
| Taiwan                   | 41.8        | 46.6        | 11.6        | 3,790            | 666          | 470            | 12.4       | 34.3        | 60.0        | 5.7         |
| Tajikistan               | 15.3        | 22.4        | 62.3        | 3,760            | 1,240        | 320            | 8.6        | 18.1        | 41.7        | 40.2        |
| Tanzania                 | 0.2         | 28.5        | 71.3        | 21,600           | 1,267        | 1,700          | 8.0        | 0.2         | 57.0        | 42.8        |
| Thailand                 | 6.0         | 40.8        | 53.2        | 16,400           | 674          | 1,700          | 10.1       | 6.1         | 64.9        | 29.1        |
| Togo                     | 0.1         | 36.9        | 63.0        | 4,180            | 1,634        | 380            | 9.0        | 0.1         | 65.5        | 34.4        |
| Trinidad and Tobago      | 0.0         | 56.4        | 43.6        | 253              | 746          | 29             | 11.5       | 0.0         | 78.8        | 21.2        |
| Tunisia                  | 34.5        | 5.4         | 60.1        | 2,010            | 797          | 150            | 7.4        | 47.6        | 11.7        | 40.7        |
| Turkey                   | 78.5        | 0.3         | 21.2        | 11,700           | 577          | 1,100          | 9.2        | 87.4        | 0.6         | 12.0        |
| Turkmenistan             | 18.5        | 6.8         | 74.7        | 3,720            | 1,211        | 250            | 6.8        | 27.8        | 16.0        | 56.2        |
| Turks and Caicos Islands | 0.0         | 0.0         | 100.0       | 0.4              | 702          | 0.0            | 3.4        | 0.0         | 0.0         | 100.0       |
| Uganda                   | 1.1         | 25.9        | 73.0        | 16,000           | 1,243        | 1,300          | 7.7        | 1.5         | 53.7        | 44.9        |
| Ukraine                  | 48.1        | 11.4        | 40.5        | 9,300            | 605          | 830            | 9.0        | 54.8        | 20.4        | 24.8        |
| United Arab Emirates     | 99.9        | 0.0         | 0.1         | 420              | 253          | 43             | 10.2       | 99.9        | 0.0         | 0.1         |
| United Kingdom           | 96.4        | 0.1         | 3.4         | 3,800            | 239          | 390            | 10.0       | 97.9        | 0.2         | 1.9         |
| United States            | 77.1        | 2.5         | 20.5        | 290,000          | 3,070        | 27,000         | 9.3        | 84.4        | 4.2         | 11.4        |
| Uruguay                  | 40.7        | 39.5        | 19.8        | 670              | 999          | 76             | 11.4       | 36.4        | 55.4        | 8.1         |
| Uzbekistan               | 22.7        | 20.8        | 56.5        | 14,000           | 1,246        | 1,200          | 8.7        | 26.6        | 38.2        | 35.2        |
| Vanuatu                  | 7.4         | 13.4        | 79.2        | 43               | 1,207        | 3              | 7.9        | 9.5         | 27.0        | 63.5        |
| Venezuela                | 91.9        | 0.0         | 8.1         | 17,000           | 1,796        | 1,600          | 9.8        | 95.9        | 0.0         | 4.1         |
| Vietnam                  | 1.0         | 54.6        | 44.3        | 33,000           | 1,031        | 3,800          | 11.4       | 0.9         | 76.4        | 22.7        |
| Virgin Islands, U.S.     | 24.6        | 20.6        | 54.7        | 6                | 734          | 0.5            | 8.8        | 28.7        | 37.7        | 33.6        |
| Western Sahara           | 0.0         | 87.4        | 12.6        | 180              | 1,634        | 26             | 14.6       | 0.0         | 95.6        | 4.4         |
| Yemen                    | 27.3        | 15.1        | 57.6        | 11,000           | 1,247        | 930            | 8.1        | 34.2        | 29.7        | 36.1        |
| Zambia                   | 10.0        | 21.1        | 68.9        | 7,100            | 1,246        | 540            | 7.6        | 13.3        | 44.2        | 42.5        |
| Zimbabwe                 | 30.4        | 5.2         | 64.3        | 6,900            | 1,395        | 480            | 7.0        | 44.1        | 11.9        | 44.0        |
| <b>Global</b>            | <b>36.1</b> | <b>19.9</b> | <b>44.0</b> | <b>2,400,000</b> | <b>1,331</b> | <b>220,000</b> | <b>9.2</b> | <b>38.2</b> | <b>36.0</b> | <b>25.7</b> |

65 **Table S-4. Total length of rivers per country with a predicted risk quotient (RQ)  $\geq 1$  for SMX for Scenarios 2**  
**(low-flow conditions) and 1 (average-flow conditions). See Table 1 (main manuscript) for scenario settings. The**  
**total length of rivers is extracted for each country from the RiverATLAS database (Linke et al., 2019)**  
**accounting for all rivers in the world with long-term annual average discharge above  $0.1 \text{ m}^3 \text{ s}^{-1}$  (i.e., a global**  
70 **total of 23.9 million km). The increase in length of rivers presenting risk of exposure based on specific conditions**  
**was calculated by running the model for the pertinent scenario but changing the parameters and configurations**  
**accordingly.**

| Country/ Territory                | Total length of analyzed rivers (km) | RQ $\geq 1$ at low-flow conditions |                   |                                             |                                           | RQ $\geq 1$ at average-flow conditions |                   |                                             |                                           |
|-----------------------------------|--------------------------------------|------------------------------------|-------------------|---------------------------------------------|-------------------------------------------|----------------------------------------|-------------------|---------------------------------------------|-------------------------------------------|
|                                   |                                      | Length of rivers (km)              | % of total length | % increase in length without instream decay | % increase in length without lake removal | Length of rivers (km)                  | % of total length | % increase in length without instream decay | % increase in length without lake removal |
| Afghanistan                       | 79,700                               | 4,640                              | 5.8               | 9.9                                         | 2.2                                       | 56                                     | 0.1               | 0.0                                         | 16.1                                      |
| Åland                             | 44                                   | 0                                  | 0.0               | 0.0                                         | 0.0                                       | 0                                      | 0.0               | 0.0                                         | 0.0                                       |
| Albania                           | 8,080                                | 14                                 | 0.2               | 0.0                                         | 42.9                                      | 0                                      | 0.0               | 0.0                                         | 0.0                                       |
| Algeria                           | 94,200                               | 8,760                              | 9.3               | 5.8                                         | 9.9                                       | 806                                    | 0.9               | 16.4                                        | 15.0                                      |
| Andorra                           | 83                                   | 0                                  | 0.0               | 0.0                                         | 0.0                                       | 0                                      | 0.0               | 0.0                                         | 0.0                                       |
| Angola                            | 227,000                              | 575                                | 0.3               | 3.0                                         | 9.9                                       | 137                                    | 0.1               | 0.0                                         | 0.0                                       |
| Anguilla                          | 2                                    | 0                                  | 0.0               | 0.0                                         | 0.0                                       | 0                                      | 0.0               | 0.0                                         | 0.0                                       |
| Antigua and Barbuda               | 36                                   | 0                                  | 0.0               | 0.0                                         | 0.0                                       | 0                                      | 0.0               | 0.0                                         | 0.0                                       |
| Argentina                         | 330,000                              | 3,610                              | 1.1               | 9.5                                         | 52.7                                      | 188                                    | 0.1               | 0.0                                         | 0.0                                       |
| Armenia                           | 4,020                                | 240                                | 6.0               | 0.0                                         | 2.1                                       | 48                                     | 1.2               | 0.0                                         | 0.0                                       |
| Aruba                             | 0                                    | 0                                  | 0.0               | 0.0                                         | 0.0                                       | 0                                      | 0.0               | 0.0                                         | 0.0                                       |
| Australia                         | 680,000                              | 2,640                              | 0.4               | 31.5                                        | 26.4                                      | 0                                      | 0.0               | 0.0                                         | 0.0                                       |
| Austria                           | 22,900                               | 0                                  | 0.0               | 0.0                                         | 0.0                                       | 0                                      | 0.0               | 0.0                                         | 0.0                                       |
| Azerbaijan                        | 13,400                               | 372                                | 2.8               | 4.6                                         | 9.9                                       | 34                                     | 0.3               | 0.0                                         | 8.8                                       |
| Bahamas                           | 1,450                                | 0                                  | 0.0               | 0.0                                         | 0.0                                       | 0                                      | 0.0               | 0.0                                         | 0.0                                       |
| Bahrain                           | 0                                    | 0                                  | 0.0               | 0.0                                         | 0.0                                       | 0                                      | 0.0               | 0.0                                         | 0.0                                       |
| Bangladesh                        | 56,600                               | 1,770                              | 3.1               | 1.5                                         | 3.9                                       | 44                                     | 0.1               | 0.0                                         | 2.3                                       |
| Barbados                          | 80                                   | 0                                  | 0.0               | 0.0                                         | 0.0                                       | 0                                      | 0.0               | 0.0                                         | 0.0                                       |
| Belarus                           | 43,000                               | 15                                 | 0.0               | 0.0                                         | 186.7                                     | 15                                     | 0.0               | 0.0                                         | 0.0                                       |
| Belgium                           | 7,870                                | 0                                  | 0.0               | 0.0                                         | 0.0                                       | 0                                      | 0.0               | 0.0                                         | 0.0                                       |
| Belize                            | 6,750                                | 0                                  | 0.0               | 0.0                                         | 0.0                                       | 0                                      | 0.0               | 0.0                                         | 0.0                                       |
| Benin                             | 21,600                               | 263                                | 1.2               | 0.0                                         | 25.9                                      | 20                                     | 0.1               | 0.0                                         | 0.0                                       |
| Bhutan                            | 10,400                               | 0                                  | 0.0               | 0.0                                         | 0.0                                       | 0                                      | 0.0               | 0.0                                         | 0.0                                       |
| Bolivia                           | 212,000                              | 619                                | 0.3               | 3.1                                         | 27.3                                      | 61                                     | 0.0               | 0.0                                         | 4.9                                       |
| Bonaire, Saint Eustatius and Saba | 4                                    | 0                                  | 0.0               | 0.0                                         | 0.0                                       | 0                                      | 0.0               | 0.0                                         | 0.0                                       |
| Bosnia and Herzegovina            | 13,300                               | 7                                  | 0.1               | 0.0                                         | 0.0                                       | 0                                      | 0.0               | 0.0                                         | 0.0                                       |
| Botswana                          | 27,000                               | 2,150                              | 8.0               | 20.2                                        | 46.6                                      | 9                                      | 0.0               | 277.8                                       | 4522.2                                    |
| Brazil                            | 2,410,000                            | 3,650                              | 0.2               | 3.9                                         | 20.6                                      | 117                                    | 0.0               | 0.0                                         | 2.6                                       |
| Brunei                            | 2,450                                | 0                                  | 0.0               | 0.0                                         | 0.0                                       | 0                                      | 0.0               | 0.0                                         | 0.0                                       |
| Bulgaria                          | 22,900                               | 42                                 | 0.2               | 0.0                                         | 0.0                                       | 0                                      | 0.0               | 0.0                                         | 0.0                                       |
| Burkina Faso                      | 26,200                               | 2,330                              | 8.9               | 18.0                                        | 75.7                                      | 101                                    | 0.4               | 32.7                                        | 155.4                                     |
| Burundi                           | 5,630                                | 121                                | 2.1               | 2.5                                         | 0.0                                       | 27                                     | 0.5               | 0.0                                         | 0.0                                       |
| Cambodia                          | 58,800                               | 64                                 | 0.1               | 0.0                                         | 4.7                                       | 0                                      | 0.0               | 0.0                                         | 0.0                                       |
| Cameroon                          | 126,000                              | 1,190                              | 0.9               | 12.0                                        | 3.1                                       | 70                                     | 0.1               | 10.0                                        | 0.0                                       |
| Canada                            | 2,060,000                            | 86                                 | 0.0               | 26.7                                        | 115.1                                     | 10                                     | 0.0               | 410.0                                       | 0.0                                       |
| Cayman Islands                    | 12                                   | 0                                  | 0.0               | 0.0                                         | 0.0                                       | 0                                      | 0.0               | 0.0                                         | 0.0                                       |
| Central African Republic          | 126,000                              | 31                                 | 0.0               | 0.0                                         | 0.0                                       | 14                                     | 0.0               | 0.0                                         | 0.0                                       |
| Chad                              | 85,100                               | 5,870                              | 6.9               | 12.5                                        | 2.4                                       | 68                                     | 0.1               | 0.0                                         | 79.4                                      |
| Chile                             | 140,000                              | 1,130                              | 0.8               | 0.9                                         | 1.0                                       | 0                                      | 0.0               | 0.0                                         | 0.0                                       |
| China                             | 1,440,000                            | 5,900                              | 0.4               | 15.8                                        | 20.7                                      | 39                                     | 0.0               | 38.5                                        | 176.9                                     |
| Colombia                          | 469,000                              | 195                                | 0.0               | 0.0                                         | 4.6                                       | 3                                      | 0.0               | 0.0                                         | 0.0                                       |
| Comoros                           | 498                                  | 0                                  | 0.0               | 0.0                                         | 0.0                                       | 0                                      | 0.0               | 0.0                                         | 0.0                                       |
| Costa Rica                        | 22,200                               | 0                                  | 0.0               | 0.0                                         | 0.0                                       | 0                                      | 0.0               | 0.0                                         | 0.0                                       |
| Côte d'Ivoire                     | 70,200                               | 427                                | 0.6               | 1.4                                         | 38.2                                      | 120                                    | 0.2               | 7.5                                         | 52.5                                      |
| Croatia                           | 13,400                               | 21                                 | 0.2               | 0.0                                         | 0.0                                       | 0                                      | 0.0               | 0.0                                         | 0.0                                       |
| Cuba                              | 25,100                               | 32                                 | 0.1               | 28.1                                        | 131.3                                     | 0                                      | 0.0               | 0.0                                         | 0.0                                       |
| Curaçao                           | 0                                    | 0                                  | 0.0               | 0.0                                         | 0.0                                       | 0                                      | 0.0               | 0.0                                         | 0.0                                       |
| Cyprus                            | 1,520                                | 126                                | 8.3               | 0.0                                         | 29.4                                      | 0                                      | 0.0               | 0.0                                         | 0.0                                       |
| Czech Republic                    | 17,000                               | 0                                  | 0.0               | 0.0                                         | 0.0                                       | 0                                      | 0.0               | 0.0                                         | 0.0                                       |
| Democratic Republic of the Congo  | 553,000                              | 879                                | 0.2               | 7.8                                         | 6.4                                       | 279                                    | 0.1               | 2.5                                         | 5.0                                       |
| Denmark                           | 9,720                                | 0                                  | 0.0               | 0.0                                         | 0.0                                       | 0                                      | 0.0               | 0.0                                         | 0.0                                       |
| Djibouti                          | 1,290                                | 290                                | 22.5              | 3.1                                         | 0.0                                       | 10                                     | 0.8               | 0.0                                         | 0.0                                       |
| Dominica                          | 179                                  | 0                                  | 0.0               | 0.0                                         | 0.0                                       | 0                                      | 0.0               | 0.0                                         | 0.0                                       |

|                    |         |         |      |      |       |       |     |      |      |
|--------------------|---------|---------|------|------|-------|-------|-----|------|------|
| Dominican Republic | 11,300  | 9       | 0.1  | 0.0  | 55.6  | 0     | 0.0 | 0.0  | 0.0  |
| East Timor         | 3,020   | 25      | 0.8  | 0.0  | 0.0   | 0     | 0.0 | 0.0  | 0.0  |
| Ecuador            | 94,600  | 474     | 0.5  | 0.0  | 17.1  | 100   | 0.1 | 0.0  | 0.0  |
| Egypt              | 6,000   | 849     | 14.2 | 43.6 | 14.1  | 248   | 4.1 | 1.2  | 2.8  |
| El Salvador        | 6,740   | 8       | 0.1  | 0.0  | 0.0   | 0     | 0.0 | 0.0  | 0.0  |
| Equatorial Guinea  | 10,700  | 0       | 0.0  | 0.0  | 0.0   | 0     | 0.0 | 0.0  | 0.0  |
| Eritrea            | 14,600  | 2,870   | 19.7 | 9.5  | 0.5   | 77    | 0.5 | 16.9 | 77.9 |
| Estonia            | 10,100  | 15      | 0.1  | 0.0  | 0.0   | 0     | 0.0 | 0.0  | 0.0  |
| Ethiopia           | 186,000 | 14,400  | 7.7  | 10.7 | 2.6   | 382   | 0.2 | 8.9  | 21.7 |
| Falkland Islands   | 1,780   | 0       | 0.0  | 0.0  | 0.0   | 0     | 0.0 | 0.0  | 0.0  |
| Faroe Islands      | 243     | 0       | 0.0  | 0.0  | 0.0   | 0     | 0.0 | 0.0  | 0.0  |
| Fiji               | 5,860   | 0       | 0.0  | 0.0  | 0.0   | 0     | 0.0 | 0.0  | 0.0  |
| Finland            | 75,800  | 0       | 0.0  | 0.0  | 0.0   | 0     | 0.0 | 0.0  | 0.0  |
| France             | 140,000 | 0       | 0.0  | 0.0  | 0.0   | 0     | 0.0 | 0.0  | 0.0  |
| French Guiana      | 32,500  | 0       | 0.0  | 0.0  | 0.0   | 0     | 0.0 | 0.0  | 0.0  |
| Gabon              | 84,000  | 0       | 0.0  | 0.0  | 0.0   | 0     | 0.0 | 0.0  | 0.0  |
| Gambia             | 1,380   | 102     | 7.4  | 12.7 | 0.0   | 24    | 1.7 | 0.0  | 0.0  |
| Georgia            | 19,500  | 17      | 0.1  | 0.0  | 135.3 | 0     | 0.0 | 0.0  | 0.0  |
| Germany            | 84,200  | 33      | 0.0  | 0.0  | 0.0   | 19    | 0.0 | 0.0  | 0.0  |
| Ghana              | 48,300  | 834     | 1.7  | 21.6 | 20.3  | 213   | 0.4 | 3.3  | 15.0 |
| Greece             | 23,600  | 40      | 0.2  | 0.0  | 0.0   | 0     | 0.0 | 0.0  | 0.0  |
| Greenland          | 287,000 | 0       | 0.0  | 0.0  | 0.0   | 0     | 0.0 | 0.0  | 0.0  |
| Grenada            | 31      | 0       | 0.0  | 0.0  | 0.0   | 0     | 0.0 | 0.0  | 0.0  |
| Guadeloupe         | 317     | 0       | 0.0  | 0.0  | 0.0   | 0     | 0.0 | 0.0  | 0.0  |
| Guam               | 158     | 0       | 0.0  | 0.0  | 0.0   | 0     | 0.0 | 0.0  | 0.0  |
| Guatemala          | 37,600  | 29      | 0.1  | 0.0  | 0.0   | 0     | 0.0 | 0.0  | 0.0  |
| Guernsey           | 1       | 0       | 0.0  | 0.0  | 0.0   | 0     | 0.0 | 0.0  | 0.0  |
| Guinea             | 68,700  | 296     | 0.4  | 4.1  | 0.0   | 1     | 0.0 | 0.0  | 0.0  |
| Guinea-Bissau      | 8,580   | 80      | 0.9  | 0.0  | 0.0   | 6     | 0.1 | 0.0  | 0.0  |
| Guyana             | 71,600  | 20      | 0.0  | 0.0  | 0.0   | 0     | 0.0 | 0.0  | 0.0  |
| Haiti              | 6,020   | 101     | 1.7  | 0.0  | 0.0   | 37    | 0.6 | 0.0  | 0.0  |
| Honduras           | 33,300  | 14      | 0.0  | 0.0  | 0.0   | 0     | 0.0 | 0.0  | 0.0  |
| Hong Kong          | 168     | 1       | 0.6  | 0.0  | 0.0   | 0     | 0.0 | 0.0  | 0.0  |
| Hungary            | 16,700  | 16      | 0.1  | 37.5 | 125.0 | 7     | 0.0 | 0.0  | 0.0  |
| Iceland            | 42,700  | 0       | 0.0  | 0.0  | 0.0   | 0     | 0.0 | 0.0  | 0.0  |
| India              | 776,000 | 123,000 | 15.9 | 6.9  | 17.9  | 3,370 | 0.4 | 17.4 | 37.1 |
| Indonesia          | 705,000 | 1,070   | 0.2  | 2.1  | 3.8   | 13    | 0.0 | 0.0  | 0.0  |
| Iran               | 202,000 | 14,500  | 7.2  | 6.3  | 2.3   | 800   | 0.4 | 3.9  | 1.4  |
| Iraq               | 36,400  | 6,100   | 16.8 | 3.9  | 7.4   | 171   | 0.5 | 19.9 | 1.8  |
| Ireland            | 21,200  | 0       | 0.0  | 0.0  | 0.0   | 0     | 0.0 | 0.0  | 0.0  |
| Isle of Man        | 126     | 0       | 0.0  | 0.0  | 0.0   | 0     | 0.0 | 0.0  | 0.0  |
| Israel             | 3,110   | 818     | 26.3 | 4.2  | 17.1  | 26    | 0.8 | 0.0  | 0.0  |
| Italy              | 75,400  | 236     | 0.3  | 0.0  | 11.0  | 24    | 0.0 | 0.0  | 0.0  |
| Jamaica            | 2,650   | 42      | 1.6  | 0.0  | 0.0   | 0     | 0.0 | 0.0  | 0.0  |
| Japan              | 126,000 | 4       | 0.0  | 0.0  | 0.0   | 0     | 0.0 | 0.0  | 0.0  |
| Jersey             | 6       | 0       | 0.0  | 0.0  | 0.0   | 0     | 0.0 | 0.0  | 0.0  |
| Jordan             | 2,650   | 636     | 24.0 | 4.7  | 22.3  | 52    | 2.0 | 15.4 | 0.0  |
| Kazakhstan         | 152,000 | 2,980   | 2.0  | 20.7 | 56.3  | 127   | 0.1 | 4.7  | 35.4 |
| Kenya              | 88,400  | 2,320   | 2.6  | 6.0  | 21.4  | 316   | 0.4 | 10.8 | 18.4 |
| Kiribati           | 1       | 0       | 0.0  | 0.0  | 0.0   | 0     | 0.0 | 0.0  | 0.0  |
| Kosovo             | 2,850   | 0       | 0.0  | 0.0  | 0.0   | 0     | 0.0 | 0.0  | 0.0  |
| Kuwait             | 196     | 18      | 9.2  | 0.0  | 0.0   | 0     | 0.0 | 0.0  | 0.0  |
| Kyrgyzstan         | 34,800  | 933     | 2.7  | 4.4  | 13.3  | 0     | 0.0 | 0.0  | 0.0  |
| Laos               | 72,300  | 53      | 0.1  | 0.0  | 0.0   | 0     | 0.0 | 0.0  | 0.0  |
| Latvia             | 15,900  | 0       | 0.0  | 0.0  | 0.0   | 0     | 0.0 | 0.0  | 0.0  |
| Lebanon            | 2,650   | 15      | 0.6  | 93.3 | 0.0   | 0     | 0.0 | 0.0  | 0.0  |
| Lesotho            | 4,980   | 36      | 0.7  | 97.2 | 80.6  | 0     | 0.0 | 0.0  | 0.0  |
| Liberia            | 38,800  | 60      | 0.2  | 0.0  | 0.0   | 0     | 0.0 | 0.0  | 0.0  |
| Libya              | 42,600  | 3,610   | 8.5  | 39.1 | 3.5   | 30    | 0.1 | 0.0  | 0.0  |
| Liechtenstein      | 60      | 0       | 0.0  | 0.0  | 0.0   | 0     | 0.0 | 0.0  | 0.0  |
| Lithuania          | 15,500  | 0       | 0.0  | 0.0  | 0.0   | 0     | 0.0 | 0.0  | 0.0  |
| Luxembourg         | 674     | 0       | 0.0  | 0.0  | 0.0   | 0     | 0.0 | 0.0  | 0.0  |
| Macedonia          | 5,290   | 12      | 0.2  | 0.0  | 0.0   | 0     | 0.0 | 0.0  | 0.0  |
| Madagascar         | 172,000 | 259     | 0.2  | 0.0  | 3.9   | 16    | 0.0 | 0.0  | 0.0  |
| Malawi             | 20,500  | 1,940   | 9.5  | 4.4  | 3.6   | 38    | 0.2 | 7.9  | 0.0  |
| Malaysia           | 128,000 | 0       | 0.0  | 0.0  | 0.0   | 0     | 0.0 | 0.0  | 0.0  |
| Mali               | 84,600  | 2,880   | 3.4  | 5.6  | 6.4   | 129   | 0.2 | 14.7 | 8.5  |
| Malta              | 17      | 0       | 0.0  | 0.0  | 0.0   | 0     | 0.0 | 0.0  | 0.0  |
| Martinique         | 270     | 0       | 0.0  | 0.0  | 0.0   | 0     | 0.0 | 0.0  | 0.0  |
| Mauritania         | 33,100  | 2,720   | 8.2  | 2.2  | 1.9   | 0     | 0.0 | 0.0  | 0.0  |

|                                  |           |        |      |       |       |       |      |       |       |
|----------------------------------|-----------|--------|------|-------|-------|-------|------|-------|-------|
| Mayotte                          | 56        | 0      | 0.0  | 0.0   | 0.0   | 0     | 0.0  | 0.0   | 0.0   |
| Mexico                           | 270,000   | 9,180  | 3.4  | 9.8   | 30.0  | 1,180 | 0.4  | 7.7   | 19.3  |
| Micronesia                       | 136       | 0      | 0.0  | 0.0   | 0.0   | 0     | 0.0  | 0.0   | 0.0   |
| Moldova                          | 6,160     | 33     | 0.5  | 0.0   | 103.0 | 0     | 0.0  | 0.0   | 0.0   |
| Mongolia                         | 70,500    | 1,520  | 2.2  | 14.5  | 13.7  | 6     | 0.0  | 0.0   | 0.0   |
| Montenegro                       | 4,240     | 0      | 0.0  | 0.0   | 0.0   | 0     | 0.0  | 0.0   | 0.0   |
| Montserrat                       | 3         | 0      | 0.0  | 0.0   | 0.0   | 0     | 0.0  | 0.0   | 0.0   |
| Morocco                          | 52,800    | 3,650  | 6.9  | 4.5   | 5.8   | 164   | 0.3  | 4.3   | 0.0   |
| Mozambique                       | 162,000   | 1,170  | 0.7  | 18.1  | 66.5  | 59    | 0.0  | 252.5 | 0.0   |
| Myanmar                          | 249,000   | 704    | 0.3  | 1.1   | 7.4   | 9     | 0.0  | 0.0   | 33.3  |
| Namibia                          | 35,800    | 1,800  | 5.0  | 33.8  | 20.1  | 20    | 0.1  | 65.0  | 230.0 |
| Nauru                            | 4         | 0      | 0.0  | 0.0   | 0.0   | 0     | 0.0  | 0.0   | 0.0   |
| Nepal                            | 49,200    | 1,240  | 2.5  | 4.1   | 0.0   | 14    | 0.0  | 0.0   | 0.0   |
| Netherlands                      | 8,310     | 27     | 0.3  | 0.0   | 37.0  | 0     | 0.0  | 0.0   | 0.0   |
| New Caledonia                    | 4,300     | 0      | 0.0  | 0.0   | 0.0   | 0     | 0.0  | 0.0   | 0.0   |
| New Zealand                      | 91,100    | 0      | 0.0  | 0.0   | 0.0   | 0     | 0.0  | 0.0   | 0.0   |
| Nicaragua                        | 42,100    | 44     | 0.1  | 6.8   | 0.0   | 0     | 0.0  | 0.0   | 0.0   |
| Niger                            | 49,500    | 7,990  | 16.1 | 8.7   | 7.9   | 444   | 0.9  | 25.2  | 73.2  |
| Nigeria                          | 201,000   | 12,600 | 6.3  | 7.2   | 11.3  | 673   | 0.3  | 48.6  | 85.9  |
| North Korea                      | 29,700    | 475    | 1.6  | 0.2   | 24.6  | 6     | 0.0  | 0.0   | 0.0   |
| Northern Mariana Islands         | 44        | 0      | 0.0  | 0.0   | 0.0   | 0     | 0.0  | 0.0   | 0.0   |
| Norway                           | 93,000    | 14     | 0.0  | 0.0   | 35.7  | 0     | 0.0  | 0.0   | 0.0   |
| Oman                             | 14,000    | 4,620  | 33.0 | 3.2   | 0.1   | 0     | 0.0  | 0.0   | 0.0   |
| Pakistan                         | 102,000   | 34,200 | 33.5 | 6.9   | 4.0   | 8,750 | 8.6  | 2.9   | 4.1   |
| Palau                            | 68        | 0      | 0.0  | 0.0   | 0.0   | 0     | 0.0  | 0.0   | 0.0   |
| Palestina                        | 1,240     | 856    | 69.0 | 2.6   | 0.1   | 134   | 10.8 | 15.7  | 0.0   |
| Panama                           | 26,900    | 0      | 0.0  | 0.0   | 0.0   | 0     | 0.0  | 0.0   | 0.0   |
| Papua New Guinea                 | 190,000   | 0      | 0.0  | 0.0   | 0.0   | 0     | 0.0  | 0.0   | 0.0   |
| Paraguay                         | 63,700    | 162    | 0.3  | 117.9 | 0.0   | 59    | 0.1  | 0.0   | 0.0   |
| Peru                             | 425,000   | 795    | 0.2  | 4.0   | 7.3   | 26    | 0.0  | 0.0   | 57.7  |
| Philippines                      | 107,000   | 368    | 0.3  | 0.5   | 3.0   | 10    | 0.0  | 0.0   | 0.0   |
| Poland                           | 64,700    | 9      | 0.0  | 44.4  | 0.0   | 0     | 0.0  | 0.0   | 0.0   |
| Portugal                         | 21,300    | 56     | 0.3  | 0.0   | 0.0   | 0     | 0.0  | 0.0   | 0.0   |
| Puerto Rico                      | 2,270     | 0      | 0.0  | 0.0   | 0.0   | 0     | 0.0  | 0.0   | 0.0   |
| Qatar                            | 0         | 0      | 0.0  | 0.0   | 0.0   | 0     | 0.0  | 0.0   | 0.0   |
| Republic of Congo                | 88,200    | 61     | 0.1  | 0.0   | 0.0   | 17    | 0.0  | 0.0   | 0.0   |
| Romania                          | 51,900    | 108    | 0.2  | 0.0   | 8.3   | 25    | 0.0  | 0.0   | 0.0   |
| Russia                           | 3,430,000 | 1,870  | 0.1  | 4.5   | 50.9  | 56    | 0.0  | 0.0   | 1.8   |
| Rwanda                           | 4,980     | 64     | 1.3  | 14.1  | 4.7   | 22    | 0.4  | 0.0   | 0.0   |
| Saint Kitts and Nevis            | 1         | 0      | 0.0  | 0.0   | 0.0   | 0     | 0.0  | 0.0   | 0.0   |
| Saint Lucia                      | 156       | 0      | 0.0  | 0.0   | 0.0   | 0     | 0.0  | 0.0   | 0.0   |
| Saint Pierre and Miquelon        | 27        | 0      | 0.0  | 0.0   | 0.0   | 0     | 0.0  | 0.0   | 0.0   |
| Saint Vincent and the Grenadines | 61        | 0      | 0.0  | 0.0   | 0.0   | 0     | 0.0  | 0.0   | 0.0   |
| Saint-Martin                     | 1         | 0      | 0.0  | 0.0   | 0.0   | 0     | 0.0  | 0.0   | 0.0   |
| San Marino                       | 12        | 0      | 0.0  | 0.0   | 0.0   | 0     | 0.0  | 0.0   | 0.0   |
| Sao Tome and Principe            | 259       | 0      | 0.0  | 0.0   | 0.0   | 0     | 0.0  | 0.0   | 0.0   |
| Saudi Arabia                     | 71,400    | 11,800 | 16.5 | 12.0  | 0.3   | 67    | 0.1  | 35.8  | 0.0   |
| Senegal                          | 18,500    | 1,190  | 6.4  | 10.8  | 7.0   | 97    | 0.5  | 0.0   | 0.0   |
| Serbia                           | 15,500    | 0      | 0.0  | 0.0   | 0.0   | 0     | 0.0  | 0.0   | 0.0   |
| Seychelles                       | 11        | 0      | 0.0  | 0.0   | 0.0   | 0     | 0.0  | 0.0   | 0.0   |
| Sierra Leone                     | 31,400    | 101    | 0.3  | 0.0   | 0.0   | 0     | 0.0  | 0.0   | 0.0   |
| Singapore                        | 160       | 0      | 0.0  | 0.0   | 0.0   | 0     | 0.0  | 0.0   | 0.0   |
| Sint Maarten                     | 2         | 0      | 0.0  | 0.0   | 0.0   | 0     | 0.0  | 0.0   | 0.0   |
| Slovakia                         | 11,000    | 21     | 0.2  | 0.0   | 0.0   | 0     | 0.0  | 0.0   | 0.0   |
| Slovenia                         | 5,670     | 0      | 0.0  | 0.0   | 0.0   | 0     | 0.0  | 0.0   | 0.0   |
| Solomon Islands                  | 9,180     | 0      | 0.0  | 0.0   | 0.0   | 0     | 0.0  | 0.0   | 0.0   |
| Somalia                          | 42,200    | 7,440  | 17.6 | 8.3   | 0.0   | 32    | 0.1  | 34.4  | 0.0   |
| South Africa                     | 107,000   | 13,900 | 13.0 | 10.8  | 43.0  | 3,770 | 3.5  | 27.6  | 68.2  |
| South Korea                      | 25,700    | 61     | 0.2  | 0.0   | 3.3   | 0     | 0.0  | 0.0   | 0.0   |
| South Sudan                      | 74,200    | 856    | 1.2  | 3.9   | 15.4  | 68    | 0.1  | 19.1  | 0.0   |
| Spain                            | 90,600    | 436    | 0.5  | 1.4   | 8.0   | 0     | 0.0  | 0.0   | 0.0   |
| Sri Lanka                        | 18,800    | 30     | 0.2  | 0.0   | 10.0  | 0     | 0.0  | 0.0   | 0.0   |
| Sudan                            | 100,000   | 15,100 | 15.1 | 7.7   | 1.4   | 290   | 0.3  | 34.5  | 18.6  |
| Suriname                         | 45,800    | 0      | 0.0  | 0.0   | 0.0   | 0     | 0.0  | 0.0   | 0.0   |
| Svalbard and Jan Mayen           | 13,300    | 0      | 0.0  | 0.0   | 0.0   | 0     | 0.0  | 0.0   | 0.0   |
| Swaziland                        | 3,480     | 47     | 1.4  | 0.0   | 0.0   | 0     | 0.0  | 0.0   | 0.0   |
| Sweden                           | 103,000   | 9      | 0.0  | 0.0   | 844.4 | 0     | 0.0  | 0.0   | 0.0   |
| Switzerland                      | 12,700    | 0      | 0.0  | 0.0   | 0.0   | 0     | 0.0  | 0.0   | 0.0   |
| Syria                            | 11,900    | 2,180  | 18.3 | 6.1   | 8.2   | 147   | 1.2  | 4.1   | 0.0   |

|                      |                   |                |            |            |             |               |            |             |             |
|----------------------|-------------------|----------------|------------|------------|-------------|---------------|------------|-------------|-------------|
| Taiwan               | 13,100            | 15             | 0.1        | 0.0        | 20.0        | 3             | 0.0        | 0.0         | 0.0         |
| Tajikistan           | 28,100            | 629            | 2.2        | 0.8        | 6.0         | 11            | 0.0        | 0.0         | 0.0         |
| Tanzania             | 161,000           | 3,000          | 1.9        | 6.7        | 12.9        | 324           | 0.2        | 0.0         | 9.0         |
| Thailand             | 135,000           | 626            | 0.5        | 3.2        | 24.3        | 53            | 0.0        | 15.1        | 0.0         |
| Togo                 | 12,600            | 115            | 0.9        | 0.0        | 28.7        | 54            | 0.4        | 0.0         | 0.0         |
| Trinidad and Tobago  | 1,240             | 0              | 0.0        | 0.0        | 0.0         | 0             | 0.0        | 0.0         | 0.0         |
| Tunisia              | 14,100            | 1,440          | 10.2       | 4.0        | 3.3         | 19            | 0.1        | 26.3        | 0.0         |
| Turkey               | 151,000           | 1,390          | 0.9        | 8.0        | 10.1        | 0             | 0.0        | 0.0         | 0.0         |
| Turkmenistan         | 14,900            | 3,920          | 26.3       | 4.0        | 11.9        | 402           | 2.7        | 8.2         | 2.2         |
| Uganda               | 34,100            | 700            | 2.1        | 9.4        | 0.9         | 150           | 0.4        | 12.0        | 0.0         |
| Ukraine              | 98,300            | 490            | 0.5        | 5.3        | 40.0        | 0             | 0.0        | 0.0         | 0.0         |
| United Arab Emirates | 973               | 665            | 68.3       | 1.8        | 4.2         | 0             | 0.0        | 0.0         | 0.0         |
| United Kingdom       | 69,500            | 0              | 0.0        | 0.0        | 0.0         | 0             | 0.0        | 0.0         | 0.0         |
| United States        | 1,780,000         | 10,700         | 0.6        | 13.5       | 30.9        | 1,240         | 0.1        | 17.7        | 69.1        |
| Uruguay              | 48,800            | 56             | 0.1        | 0.0        | 0.0         | 0             | 0.0        | 0.0         | 0.0         |
| Uzbekistan           | 18,500            | 3,440          | 18.6       | 4.5        | 18.8        | 312           | 1.7        | 10.9        | 41.3        |
| Vanuatu              | 2,870             | 0              | 0.0        | 0.0        | 0.0         | 0             | 0.0        | 0.0         | 0.0         |
| Venezuela            | 285,000           | 1,090          | 0.4        | 7.2        | 7.0         | 190           | 0.1        | 9.5         | 8.4         |
| Vietnam              | 110,000           | 1,350          | 1.2        | 5.1        | 4.6         | 121           | 0.1        | 0.0         | 3.3         |
| Virgin Islands, U.S. | 28                | 0              | 0.0        | 0.0        | 0.0         | 0             | 0.0        | 0.0         | 0.0         |
| Western Sahara       | 10,300            | 62             | 0.6        | 0.0        | 0.0         | 32            | 0.3        | 0.0         | 0.0         |
| Yemen                | 23,100            | 8,540          | 37.0       | 2.0        | 0.1         | 1,210         | 5.3        | 5.7         | 1.3         |
| Zambia               | 134,000           | 732            | 0.5        | 6.7        | 38.5        | 172           | 0.1        | 0.0         | 5.8         |
| Zimbabwe             | 55,000            | 642            | 1.2        | 9.2        | 155.8       | 78            | 0.1        | 115.4       | 59.0        |
| <b>Global</b>        | <b>23,900,000</b> | <b>409,000</b> | <b>1.7</b> | <b>8.4</b> | <b>14.4</b> | <b>29,000</b> | <b>0.1</b> | <b>12.8</b> | <b>26.8</b> |

#### S.4 References

- 75 Arsand, J. B., Hoff, R. B., Jank, L., Bussamara, R., Dallegrove, A., Bento, F. M., Kmetzsch, L., Falção, D. A., do Carmo Ruaro Peralba, M., de Araujo Gomes, A., & Pizzolato, T. M. (2020). Presence of antibiotic resistance genes and its association with antibiotic occurrence in Dilúvio River in southern Brazil. *Science of The Total Environment*, 738, 139781. <https://doi.org/10.1016/j.scitotenv.2020.139781>
- 80 Aydin, E., & Talinli, I. (2013). Analysis, occurrence and fate of commonly used pharmaceuticals and hormones in the Buyukcekmece Watershed, Turkey. *Chemosphere*, 90(6), 2004-2012. <https://doi.org/10.1016/j.chemosphere.2012.10.074>
- 85 Bagnis, S., Boxall, A., Gachanja, A., Fitzsimons, M., Murigi, M., Snape, J., Tappin, A., Wilkinson, J., & Comber, S. (2020). Characterization of the Nairobi River catchment impact zone and occurrence of pharmaceuticals: Implications for an impact zone inclusive environmental risk assessment. *Science of The Total Environment*, 703, 134925. <https://doi.org/10.1016/j.scitotenv.2019.134925>
- 90 Barber, L. B., Keefe, S. H., Kolpin, D. W., Schnoebelen, D. J., Flynn, J. L., Brown, G. K., Furlong, E. T., Glassmeyer, S. T., Gray, J. L., Meyer, M. T., Sandstrom, M. W., Taylor, H. E., & Zaugg, S. D. (2011). *Lagrangian sampling of wastewater treatment plant effluent in Boulder Creek, Colorado, and Fourmile Creek, Iowa, during the summer of 2003 and spring of 2005—Hydrological and water-quality data* [Report](2011-1054). (Open-File Report, Issue. U. S. Geological Survey. <http://pubs.er.usgs.gov/publication/ofr20111054>
- Batt, A. L., Bruce, I. B., & Aga, D. S. (2006). Evaluating the vulnerability of surface waters to antibiotic contamination from varying wastewater treatment plant discharges. *Environmental Pollution*, 142(2), 295-302. <https://doi.org/10.1016/j.envpol.2005.10.010>
- 95 Bendz, D., Paxéus, N. A., Ginn, T. R., & Loge, F. J. (2005). Occurrence and fate of pharmaceutically active compounds in the environment, a case study: Höje River in Sweden. *Journal of Hazardous Materials*, 122(3), 195-204. <https://doi.org/10.1016/j.jhazmat.2005.03.012>
- 100 Böger, B., Surek, M., de O Vilhena, R., Fachi, M. M., Junkert, A. M., Santos, J. M., Domingos, E. L., de F Cobre, A., Momade, D. R., & Pontarolo, R. (2021). Occurrence of antibiotics and antibiotic resistant bacteria in subtropical urban rivers in Brazil. *Journal of Hazardous Materials*, 402, 123448. <https://doi.org/10.1016/j.jhazmat.2020.123448>
- Camacho-Muñoz, D., Martín, J., Santos, J. L., Aparicio, I., & Alonso, E. (2010). Occurrence, temporal evolution and risk assessment of pharmaceutically active compounds in Doñana Park (Spain). *Journal of Hazardous Materials*, 183(1-3), 602-608. <https://doi.org/10.1016/j.jhazmat.2010.07.067>
- 105 Carlson, J. C., Anderson, J. C., Low, J. E., Cardinal, P., MacKenzie, S. D., Beattie, S. A., Challis, J. K., Bennett, R. J., Meronek, S. S., Wilks, R. P. A., Buhay, W. M., Wong, C. S., & Hanson, M. L. (2013). Presence and hazards of nutrients and emerging organic micropollutants from sewage lagoon discharges into Dead Horse Creek, Manitoba, Canada. *Science of The Total Environment*, 445-446, 64-78. <https://doi.org/10.1016/j.scitotenv.2012.11.100>
- 110 Chang, X., Meyer, M. T., Liu, X., Zhao, Q., Chen, H., Chen, J.-a., Qiu, Z., Yang, L., Cao, J., & Shu, W. (2010). Determination of antibiotics in sewage from hospitals, nursery and slaughter house, wastewater treatment plant and source water in Chongqing region of Three Gorge Reservoir in China. *Environmental Pollution*, 158(5), 1444-1450. <https://doi.org/10.1016/j.envpol.2009.12.034>
- 115 Chau, H. T. C., Kadokami, K., Duong, H. T., Kong, L., Nguyen, T. T., Nguyen, T. Q., & Ito, Y. (2018). Occurrence of 1153 organic micropollutants in the aquatic environment of Vietnam. *Environmental Science and Pollution Research International*, 25(8), 7147-7156. <https://doi.org/10.1007/s11356-015-5060-z>
- Chaves, M. d. J. S., Barbosa, S. C., Malinowski, M. d. M., Volpato, D., Castro, Í. B., Franco, T. C. R. d. S., & Primel, E. G. (2020). Pharmaceuticals and personal care products in a Brazilian wetland of international importance: Occurrence and environmental risk assessment. *Science of The Total Environment*, 734, 139374. <https://doi.org/10.1016/j.scitotenv.2020.139374>
- 120 Chitescu, C. L., Kaklamanos, G., Nicolau, A. I., & Stolker, A. A. M. (2015). High sensitive multiresidue analysis of pharmaceuticals and antifungals in surface water using U-HPLC-Q-Exactive Orbitrap HRMS. Application

- to the Danube river basin on the Romanian territory. *Science of The Total Environment*, 532, 501-511. <https://doi.org/10.1016/j.scitotenv.2015.06.010>
- 125 Choi, K., Kim, Y., Park, J., Park, C. K., Kim, M., Kim, H. S., & Kim, P. (2008). Seasonal variations of several pharmaceutical residues in surface water and sewage treatment plants of Han River, Korea. *Science of The Total Environment*, 405(1), 120-128. <https://doi.org/10.1016/j.scitotenv.2008.06.038>
- Dinh, Q. T., Alliot, F., Moreau-Guigon, E., Eurin, J., Chevreuil, M., & Labadie, P. (2011). Measurement of trace levels of antibiotics in river water using on-line enrichment and triple-quadrupole LC-MS/MS. *Talanta*, 85(3), 1238-1245. <https://doi.org/10.1016/j.talanta.2011.05.013>
- 130 Ekberg, M. P., & Pletsch, B. A. (2011). *Pharmaceuticals and Personal Care Products (PPCPs) in the Streams and Aquifers of the Great Miami River Basin*. The Miami Conservancy District. <https://www.mcdwater.org/wp-content/uploads/2017/08/Pharmaceuticals-and-Personal-Care-Products-in-the-streams-and-aquifers-of-the-Great-Miami-River-Basin.pdf>
- 135 Feitosa-Felizzola, J., & Chiron, S. (2009). Occurrence and distribution of selected antibiotics in a small Mediterranean stream (Arc River, Southern France). *Journal of Hydrology*, 364(1), 50-57. <https://doi.org/10.1016/j.jhydrol.2008.10.006>
- Fick, J., Lindberg, R., Kaj, L., & Brorström-Lundén, E. (2011). *Results from the Swedish National Screening Programme 2010* Subreport 3. Pharmaceuticals). IVL Swedish Environmental Research Institute Ltd. <https://www.ivl.se/download/18.343dc99d14e8bb0f58b542e/1443183072893/B2014.pdf>
- 140 Finnegan, D. P., Simonson, L. A., & Meyer, M. T. (2010). *Occurrence of antibiotic compounds in source water and finished drinking water from the upper Scioto River Basin, Ohio, 2005-6* Scientific Investigations report 2010-5083). <https://pubs.usgs.gov/sir/2010/5083/>
- Fonseca, E., Hernández, F., Ibáñez, M., Rico, A., Pitarch, E., & Bijlsma, L. (2020). Occurrence and ecological risks of pharmaceuticals in a Mediterranean river in Eastern Spain. *Environment International*, 144, 106004. <https://doi.org/10.1016/j.envint.2020.106004>
- 145 Hanna, N., Purohit, M., Diwan, V., Chandran, S. P., Riggi, E., Parashar, V., Tamhankar, A. J., & Lundborg, C. S. (2020). Monitoring of Water Quality, Antibiotic Residues, and Antibiotic-Resistant Escherichia coli in the Kshipra River in India over a 3-Year Period. *International Journal of Environmental Research and Public Health*, 17(21). <https://doi.org/10.3390/ijerph17217706>
- 150 Joshua, D. I., Praveenkumarreddy, Y., Prabhasankar, V. P., D'Souza, A. P., Yamashita, N., & Balakrishna, K. (2020). First report of pharmaceuticals and personal care products in two tropical rivers of southwestern India. *Environmental Monitoring and Assessment*, 192(8), 529. <https://doi.org/10.1007/s10661-020-08480-2>
- 155 K'Oreje, K. O., Demeestere, K., De Wispelaere, P., Vergeynst, L., Dewulf, J., & Van Langenhove, H. (2012). From multi-residue screening to target analysis of pharmaceuticals in water: Development of a new approach based on magnetic sector mass spectrometry and application in the Nairobi River basin, Kenya. *Science of The Total Environment*, 437, 153-164. <https://doi.org/10.1016/j.scitotenv.2012.07.052>
- Kairigo, P., Ngumba, E., Sundberg, L.-R., Gachanja, A., & Tuhkanen, T. (2020). Occurrence of antibiotics and risk of antibiotic resistance evolution in selected Kenyan wastewaters, surface waters and sediments. *Science of The Total Environment*, 720, 137580. <https://doi.org/10.1016/j.scitotenv.2020.137580>
- 160 Kandie, F. J., Krauss, M., Beckers, L.-M., Massei, R., Fillinger, U., Becker, J., Liess, M., Torto, B., & Brack, W. (2020). Occurrence and risk assessment of organic micropollutants in freshwater systems within the Lake Victoria South Basin, Kenya. *Science of The Total Environment*, 714, 136748. <https://doi.org/10.1016/j.scitotenv.2020.136748>
- 165 Kasprzyk-Hordern, B., Dinsdale, R. M., & Guwy, A. J. (2007). Multi-residue method for the determination of basic/neutral pharmaceuticals and illicit drugs in surface water by solid-phase extraction and ultra performance liquid chromatography-positive electrospray ionisation tandem mass spectrometry. *Journal of Chromatography A*, 1161(1-2), 132-145. <https://doi.org/10.1016/j.chroma.2007.05.074>
- 170 Kasprzyk-Hordern, B., Dinsdale, R. M., & Guwy, A. J. (2008). The occurrence of pharmaceuticals, personal care products, endocrine disruptors and illicit drugs in surface water in South Wales, UK. *Water Research*, 42(13), 3498-3518. <https://doi.org/10.1016/j.watres.2008.04.026>



- Khan, G. A., Berglund, B., Khan, K. M., Lindgren, P.-E., & Fick, J. (2013). Occurrence and Abundance of Antibiotics and Resistance Genes in Rivers, Canal and near Drug Formulation Facilities – A Study in Pakistan. *PLoS one*, 8(6), e62712. <https://doi.org/10.1371/journal.pone.0062712>
- 175 Khan, G. A., Lindberg, R., Grabic, R., & Fick, J. (2012). The development and application of a system for simultaneously determining anti-infectives and nasal decongestants using on-line solid-phase extraction and liquid chromatography–tandem mass spectrometry. *Journal of Pharmaceutical and Biomedical Analysis*, 66, 24-32. <https://doi.org/10.1016/j.jpba.2012.02.011>
- 180 Kim, S.-C., & Carlson, K. (2007). Temporal and Spatial Trends in the Occurrence of Human and Veterinary Antibiotics in Aqueous and River Sediment Matrices. *Environmental Science & Technology*, 41(1), 50-57. <https://doi.org/10.1021/es060737+>
- Kunkel, U., & Radke, M. (2012). Fate of pharmaceuticals in rivers: Deriving a benchmark dataset at favorable attenuation conditions. *Water Research*, 46(17), 5551-5565. <https://doi.org/10.1016/j.watres.2012.07.033>
- 185 Li, Z., Sobek, A., & Radke, M. (2016). Fate of Pharmaceuticals and Their Transformation Products in Four Small European Rivers Receiving Treated Wastewater. *Environmental Science & Technology*, 50(11), 5614-5621. <https://doi.org/10.1021/acs.est.5b06327>
- Locatelli, M. A. F., Sodr , F. F., & Jardim, W. F. (2011). Determination of Antibiotics in Brazilian Surface Waters Using Liquid Chromatography–Electrospray Tandem Mass Spectrometry. *Archives of Environmental Contamination and Toxicology*, 60(3), 385-393. <https://doi.org/10.1007/s00244-010-9550-1>
- 190 Loper, C. A., Crawford, J. K., Otto, K. L., Manning, R. L., Meyer, M. T., & Furlong, E. T. (2007). *Concentrations of selected pharmaceuticals and antibiotics in south-central Pennsylvania waters, March through September 2006* [Report](300). (Data Series, Issue. U. S. G. Survey. <http://pubs.er.usgs.gov/publication/ds300>
- 195 L pez-Serna, R., P rez, S., Ginebreda, A., Petrovi , M., & Barcel , D. (2010). Fully automated determination of 74 pharmaceuticals in environmental and waste waters by online solid phase extraction–liquid chromatography–electrospray–tandem mass spectrometry. *Talanta*, 83(2), 410-424. <https://doi.org/10.1016/j.talanta.2010.09.046>
- L pez-Serna, R., Petrovi , M., & Barcel , D. (2011). Development of a fast instrumental method for the analysis of pharmaceuticals in environmental and wastewaters based on ultra high performance liquid chromatography (UHPLC)-tandem mass spectrometry (MS/MS). *Chemosphere*, 85(8), 1390-1399. <https://doi.org/10.1016/j.chemosphere.2011.07.071>
- 200 Low, K., Chai, L., Lee, C., Zhang, G., Zhang, R., Vahab, V., & Bong, C. (2021). Prevalence and risk assessment of antibiotics in riverine estuarine waters of Larut and Sangga Besar River, Perak. *Journal of Oceanology and Limnology*, 39(1), 122-134. <https://doi.org/10.1007/s00343-020-9246-y>
- 205 Luo, Y., Xu, L., Rysz, M., Wang, Y., Zhang, H., & Alvarez, P. J. (2011). Occurrence and transport of tetracycline, sulfonamide, quinolone, and macrolide antibiotics in the Haihe River Basin, China. *Environmental Science & Technology*, 45(5), 1827-1833. <https://doi.org/10.1021/es104009s>
- Managaki, S., Murata, A., Takada, H., Tuyen, B. C., & Chiem, N. H. (2007). Distribution of Macrolides, Sulfonamides, and Trimethoprim in Tropical Waters: Ubiquitous Occurrence of Veterinary Antibiotics in the Mekong Delta. *Environmental Science & Technology*, 41(23), 8004-8010. <https://doi.org/10.1021/es0709021>
- 210 Osorio, V., P rez, S., Ginebreda, A., & Barcel , D. (2012). Pharmaceuticals on a sewage impacted section of a Mediterranean River (Llobregat River, NE Spain) and their relationship with hydrological conditions. *Environmental Science and Pollution Research International*, 19(4), 1013-1025. <https://doi.org/10.1007/s11356-011-0603-4>
- 215 Pa ga, P., Santos, L., Ramos, S., Jorge, S., Silva, J. G., & Delerue-Matos, C. (2016). Presence of pharmaceuticals in the Lis river (Portugal): Sources, fate and seasonal variation. *Science of The Total Environment*, 573, 164-177. <https://doi.org/10.1016/j.scitotenv.2016.08.089>
- Rivera-Jaimes, J. A., Postigo, C., Melgoza-Alem n, R. M., Ace a, J., Barcel , D., & L pez de Alda, M. (2018). Study of pharmaceuticals in surface and wastewater from Cuernavaca, Morelos, Mexico: Occurrence and

- environmental risk assessment. *Science of The Total Environment*, 613-614, 1263-1274. <https://doi.org/10.1016/j.scitotenv.2017.09.134>
- 220 Sharma, B. M., Bečanová, J., Scheringer, M., Sharma, A., Bharat, G. K., Whitehead, P. G., Klánová, J., & Nizzetto, L. (2019). Health and ecological risk assessment of emerging contaminants (pharmaceuticals, personal care products, and artificial sweeteners) in surface and groundwater (drinking water) in the Ganges River Basin, India. *Science of The Total Environment*, 646, 1459-1467. <https://doi.org/10.1016/j.scitotenv.2018.07.235>
- 225 Shimizu, A., Takada, H., Koike, T., Takeshita, A., Saha, M., Rinawati, Nakada, N., Murata, A., Suzuki, T., Suzuki, S., Chiem, N. H., Tuyen, B. C., Viet, P. H., Siringan, M. A., Kwan, C., Zakaria, M. P., & Reungsang, A. (2013). Ubiquitous occurrence of sulfonamides in tropical Asian waters. *Science of The Total Environment*, 452-453, 108-115. <https://doi.org/10.1016/j.scitotenv.2013.02.027>
- 230 Sim, W.-J., Lee, J.-W., & Oh, J.-E. (2010). Occurrence and fate of pharmaceuticals in wastewater treatment plants and rivers in Korea. *Environmental Pollution*, 158(5), 1938-1947. <https://doi.org/10.1016/j.envpol.2009.10.036>
- Söregård, M., Campos-Pereira, H., Ullberg, M., Lai, F. Y., Golovko, O., & Ahrens, L. (2019). Mass loads, source apportionment, and risk estimation of organic micropollutants from hospital and municipal wastewater in recipient catchments. *Chemosphere*, 234, 931-941. <https://doi.org/10.1016/j.chemosphere.2019.06.041>
- 235 Spongberg, A. L., Witter, J. D., Acuña, J., Vargas, J., Murillo, M., Umaña, G., Gómez, E., & Perez, G. (2011). Reconnaissance of selected PPCP compounds in Costa Rican surface waters. *Water Research*, 45(20), 6709-6717. <https://doi.org/10.1016/j.watres.2011.10.004>
- 240 Stipaničev, D., Dragun, Z., Repec, S., Rebok, K., & Jordanova, M. (2017). Broad spectrum screening of 463 organic contaminants in rivers in Macedonia. *Ecotoxicology and Environmental Safety*, 135, 48-59. <https://doi.org/10.1016/j.ecoenv.2016.09.004>
- Tamtam, F., Mercier, F., Le Bot, B., Eurin, J., Tuc Dinh, Q., Clément, M., & Chevreuil, M. (2008). Occurrence and fate of antibiotics in the Seine River in various hydrological conditions. *Science of The Total Environment*, 393(1), 84-95. <https://doi.org/10.1016/j.scitotenv.2007.12.009>
- 245 ter Laak, T. L., van der Aa, M., Houtman, C. J., Stoks, P. G., & van Wezel, A. P. (2010). Relating environmental concentrations of pharmaceuticals to consumption: A mass balance approach for the river Rhine. *Environment International*, 36(5), 403-409. <https://doi.org/10.1016/j.envint.2010.02.009>
- Vilimanovic, D., Andaluri, G., Hannah, R., Suri, R., & MacGillivray, A. R. (2020). Occurrence and aquatic toxicity of contaminants of emerging concern (CECs) in tributaries of an urbanized section of the Delaware River Watershed. *AIMS Environmental Science*, 7(4), 302-319. <https://doi.org/10.3934/environsci.2020019>
- 250 Wille, K., Noppe, H., Verheyden, K., Vanden Bussche, J., De Wulf, E., Van Caeter, P., Janssen, C. R., De Brabander, H. F., & Vanhaecke, L. (2010). Validation and application of an LC-MS/MS method for the simultaneous quantification of 13 pharmaceuticals in seawater. *Analytical and Bioanalytical Chemistry*, 397(5), 1797-1808. <https://doi.org/10.1007/s00216-010-3702-z>
- 255 Zhang, L., Du, S., Zhang, X., Lyu, G., Dong, D., Hua, X., Zhang, W., & Guo, Z. (2020). Occurrence, distribution, and ecological risk of pharmaceuticals in a seasonally ice-sealed river: From ice formation to melting. *Journal of Hazardous Materials*, 389, 122083. <https://doi.org/10.1016/j.jhazmat.2020.122083>
